# Supplementary material
Source: PubMed Central journal article supplement (PMC2467390)
Supplement: NIHMS55621-supplement-s2.pdf [file NIHMS55621-supplement-s2.pdf]

#NEXUS

[written Wed Nov 29 12:47:15 EST 2006 by Mesquite version 1.1 (build h61) at  
bl-bio-7ng0k81/128.192.8.38]

BEGIN TAXA;

TITLE Untitled\_Taxa\_Block;

DIMENSIONS NTAX=46;

TAXLABELS

953ann01 953ann02 953ann02.2 953ann04 953ann05 953ann05.2 953ann06  
953ann06.2 953ann07 953ann07.2 953ann08 953ann08.2 953ann10 953ann11 953ann11.2  
953ann12 953ann12.2 953pet01 953pet02 953pet05 953pet06 953pet07 953pet07.2  
953pet08 953pet08.2 953pet09 953pet10 953pet10.2 953pet11 953ano01 953ano01.2  
953ano04 953ano04.2 953ano05 953ano05.2 953ano06 953ano06.2 953ano07 953ano07.2  
953ano08 953ano08.2 953ano09 953ano10 953ano10.2 953ano11 953ano12

;

END;

BEGIN CHARACTERS;

TITLE Untitled\_Character\_Matrix;

DIMENSIONS NCHAR=168;

FORMAT DATATYPE = DNA INTERLEAVE GAP = : MISSING = ?;

MATRIX

953ann01 TTATGTGGGGCCTGTGGTGAGAATTACGCATCGGACGAGTTCTGGATT

953ann02 TTATGTGGGGCCTGTGGTGAGAATTACGCATCGGACGAGTTCTGGATT

953ann02.2 TTATGTGGGGCCTGTGGTGAGAATTACGCATCCGACGAGTTCTGGATT

953ann04 TTATGTGGGGCCTGTGGTGAGAATTATGCATCGGACGAGTTCTGGATT

953ann05 TTATGTGGGGCCTGTGGTGAGAATTACGCATCGGACGAGTTCTGGATT

953ann05.2 TTATGTGGGGCCTGTGGTGAGAATTACGCATCGGACGAGTTCTGGATT

953ann06 TTATGTGGGGCCTGTGGTGAGAATTACGCATCGGACGAGTTCTGGATT

953ann06.2 TTATGTGGGGCCTGTGGTGAGAATTACGCATCCGACGAGTTCTGGATT

953ann07 TTATGTGGGGCCTGTGGTGAGAATTACGCATCGGACGAGTTCTGGATT

953ann07.2 TTATGTGGGGCCTGTGGTGAGAATTACGCATCCGACGAGTTCTGGATT

953ann08 TTATGTGGGGCCTGTGGTGAGAATTACGCATCGGACGAGTTCTGGATT

953ann08.2 TTATGTGGGGCCTGTGGTGAGAATTACGCATCCGACGAGTTCTGGATT

953ann10 TTATGTGGGGCCTGTGGTGAGAATTATGCATCGGACGAGTTCTGGATT  
953ann11 TTATGTGGGGCCTGTGGTGAGAATTACGCATCGGACGAGTTCTGGATT  
953ann11.2 TTATGTGGGGCCTGTGGTGAGAATTACGCATCCGACGAGTTCTGGATT  
953ann12 TTATGTGGGGCCTGTGGTGAGAATTACGCATCGGACGAGTTCTGGATT  
953ann12.2 TTATGTGGGGCCTGTGGTGAGAATTACGCATCGGACGAGTTCTGGATT  
953pet01 TTATGTGGGGCCTGTGGTGAGAATTATGCATCGGACGAGTTCTGGATT  
953pet02 TTATGTGGGGCCTGTGGTGAGAATTATGCATCGGACGAGTTCTGGATT  
953pet05 TTATGTGGGGCCTGTGGTGAGAATTATGCATCGGACGAGTTCTGGATT  
953pet06 TTATGTGGGGCCTGTGGTGAGAATTATGCATCGGACGAGTTCTGGATT  
953pet07 TTATGTGGGGCCTGTGGTGAGAATTATGCATCGGACGAGTTCTGGATT  
953pet07.2 TTATGTGGGGCCTGTGGTGAGAATTATGCATCCGACGAGTTCTGGATT  
953pet08 TTATGTGGGGCCTGTGGTGAGAATTATGCATCGGACGAGTTCTGGATT  
953pet08.2 TTATGTGGGGCCTGTGGTGAGAATTACGCATCCGACGAGTTCTGGATT  
953pet09 TTATGTGGGGCCTGTGGTGAGAATTATGCATCGGACGAGTTCTGGATT  
953pet10 TTATGTGGGGCCTGTGGTGAGAATTATGCATCGGACGAGTTCTGGATT  
953pet10.2 TTATGTGGGGCCTGTGGTGAGAATTACGCATCCGACGAGTTCTGGATT  
953pet11 TTATGTGGGGCCTGTGGTGAGAATTATGCATCGGACGAGTTCTGGATT  
953ano01 TTATGTGGGGCCTGTGGTGAGAATTATGCATCGGACGAGTTCTGGATT  
953ano01.2 TTATGTGGGGCCTGTGGTGAGAATTACGCATCCGACGAGTTCTGGATT  
953ano04 TTATGTGGGGCCTGTGGTGAGAATTATGCATCGGACGAGTTCTGGATT  
953ano04.2 TTATGTGGGGCCTGTGGTGAGAATTATGCATCGGACGAGTTCTGGATT  
953ano05 TTATGTGGGGCCTGTGGTGAGAATTATGCATCGGACGAGTTCTGGATT  
953ano05.2 TTATGTGGGGCCTGTGGTGAGAATTACGCATCCGACGAGTTCTGGATT  
953ano06 TTATGTGGGGCCTGTGGTGAGAATTATGCATCGGACGAGTTCTGGATT

953ano06.2 TTATGTGGGGCCTGTGGTGAGAATTACGCATCCGACGAGTTCTGGATT  
953ano07 TTATGTGGGGCCTGTGGTGAGAATTATGCATCGGACGAGTTCTGGATT  
953ano07.2 TTATGTGGGGCCTGTGGTGAGAATTACGCATCCGACGAGTTCTGGATT  
953ano08 TTATGTGGGGCCTGTGGTGAGAATTATGCATCGGACGAGTTCTGGATT  
953ano08.2 TTATGTGGGGCCTGTGGTGAGAATTACGCATCCGACGAGTTCTGGATT  
953ano09 TTATGTGGGGCCTGTGGTGAGAATTATGCATCGGACGAGTTCTGGATT  
953ano10 TTATGTGGGGCCTGTGGTGAGAATTACGCATCGGACGAGTTCTGGATT  
953ano10.2 TTATGTGGGGCCTGTGGTGAGAATTATGCATCGGACGAGTTCTGGATT  
953ano11 TTATGTGGGGCCTGTGGTGAGAATTATGCATCGGACGAGTTCTGGATT  
953ano12 TTATGTGGGGCCTGTGGTGAGAATTATGCATCGGACGAGTTCTGGATT  
  
953ann01 TGCTGCGACATTTGTGAAAAATGGTTTCATGGCAAGTGTGTGAAAATC  
953ann02 TGCTGCGACATTTGTGAAAAATGGTTTCATGGCAAGTGTGTGAAAATC  
953ann02.2 TGCTGTGACATTTGTGAAAAATGGTTTCATGGCAAGTGTGTGAAAATC  
953ann04 TGCTGCGACATTTGTGAAAAATGGTTTCATGGGAAGTGTGTGAAAATC  
953ann05 TGCTGCGACATTTGTGAAAAATGGTTTCATGGCAAGTGTGTGAAAATC  
953ann05.2 TGCTGTGACATTTGTGAAAAATGGTTTCATGGCAAGTGTGTGAAAATC  
953ann06 TGCTGCGACATTTGTGAAAAATGGTTTCATGGCAAGTGTGTGAAAATC  
953ann06.2 TGCTGCGACATTTGTGAAAAATGGTTTCATGGCAAGTGTGTGAAAATC  
953ann07 TGCTGCGACATTTGTGAAAAATGGTTTCATGGCAAGTGTGTGAAAATC  
953ann07.2 TGCTGCGACATTTGTGAAAAATGGTTTCATGGCAAGTGTGTGAAAATC  
953ann08 TGCTGCGACATTTGTGAAAAATGGTTTCATGGCAAGTGTGTGAAAATC  
953ann08.2 TGCTGCGACATTTGTGAAAAATGGTTTCATGGCAAGTGTGTGAAAATC  
953ann10 TGCTGTGACATTTGTGAAAAATGGTTTCATGGCAAGTGTGTGAAAATC

953ann11 TGCTGCGACATTTGTGAAAAATGGTTTCATGGCAAGTGTGTGAAAATC  
953ann11.2 TGCTGCGACATTTGTGAAAAATGGTTTCATGGCAAGTGTGTGAAAATC  
953ann12 TGCTGCGACATTTGTGAAAAATGGTTTCATGGCAAGTGTGTGAAAATC  
953ann12.2 TGCTGTGACATTTGTGAAAAATGGTTTCATGGCAAGTGTGTGAAAATC  
953pet01 TGCTGCGACATTTGTGAAAAATGGTTTCATGGCAAGTGTGTGAAAATC  
953pet02 TGCTGCGACATTTGTGAAAAATGGTTTCATGGCAAGTGTGTGAAAATC  
953pet05 TGCTGCGACATTTGTGAAAAATGGTTTCATGGCAAGTGTGTGAAAATC  
953pet06 TGCTGCGACATTTGTGAAAAATGGTTTCATGGCAAGTGTGTGAAAATC  
953pet07 TGCTGTGACATTTGTGAAAAATGGTTTCATGGCAAGTGTGTGAAAATC  
953pet07.2 TGCTGTGACATTTGTGAAAAATGGTTTCATGGCAAGTGTGTGAAAATC  
953pet08 TGCTGTGACATTTGTGAAAAATGGTTTCATGGCAAGTGTGTGAAAATC  
953pet08.2 TGCTGCGACATTTGTGAAAAATGGTTTCATGGCAAGTGTGTGAAAATC  
953pet09 TGCTGTGACATTTGTGAAAAATGGTTTCATGGCAAGTGTGTGAAAATC  
953pet10 TGCTGTGACATTTGTGAAAAATGGTTTCATGGCAAGTGTGTGAAAATC  
953pet10.2 TGCTGCGACATTTGTGAAAAATGGTTTCATGGCAAGTGTGTGAAAATC  
953pet11 TGCTGTGACATTTGTGAAAAATGGTTTCATGGCAAGTGTGTGAAAATC  
953ano01 TGCTGCGACATTTGTGAAAAATGGTTTCATGGCAAGTGTGTGAAAATC  
953ano01.2 TGCTGTGACATTTGTGAAAAATGGTTTCATGGCAAGTGTGTGAAAATC  
953ano04 TGCTGCGACATTTGTGAAAAATGGTTTCATGGCAAGTGTGTGAAAATC  
953ano04.2 TGCTGTGACATTTGTGAAAAATGGTTTCATGGCAAGTGTGTGAAAATC  
953ano05 TGCTGCGACATTTGTGAAAAATGGTTTCATGGCAAGTGTGTGAAAATC  
953ano05.2 TGCTGTGACATTTGTGAAAAATGGTTTCATGGCAAGTGTGTGAAAATC  
953ano06 TGCTGCGACATTTGTGAAAAATGGTTTCATGGCAAGTGTGTGAAAATC  
953ano06.2 TGCTGTGACATTTGTGAAAAATGGTTTCATGGCAAGTGTGTGAAAATC

953ano07 TGCTGCGACATTTGTGAAAAATGGTTTCATGGCAAGTGTGTGAAAATC  
953ano07.2 TGCTGTGACATTTGTGAAAAATGGTTTCATGGCAAGTGTGTGAAAATC  
953ano08 TGCTGCGACATTTGTGAAAAATGGTTTCATGGCAAGTGTGTGAAAATC  
953ano08.2 TGCTGTGACATTTGTGAAAAATGGTTTCATGGCAAGTGTGTGAAAATC  
953ano09 TGCTGCGACATTTGTGAAAAATGGTTTCATGGCAAGTGTGTGAAAATC  
953ano10 TGCTGTGACATTTGTGAAAAATGGTTTCATGGCAAGTGTGTGAAAATC  
953ano10.2 TGCTGCGACATTTGTGAAAAATGGTTTCATGGCAAGTGTGTGAAAATC  
953ano11 TGCTGCGACATTTGTGAAAAATGGTTTCATGGCAAGTGTGTGAAAATC  
953ano12 TGCTGCGACATTTGTGAAAAATGGTTTCATGGCAAGTGTGTGAAAATC  
  
953ann01 ACTCCAGCAAGAGCAGAGCACATTAAGCAGTACAAGTGCCCTTCATGC  
953ann02 ACTCCAGCAAGAGCAGAGCACATTAAGCAGTACAAGTGCCCTTCATGC  
953ann02.2 ACTCCAGCAAGAGCAGAGCACATTAAGCAGTACAAGTGCCCTTCATGC  
953ann04 ACTCCAGCAAGAGCAGAGCACATTAAGCAGTACAAGTGCCCTTCATGC  
953ann05 ACTCCAGCAAGAGCAGAGCACATTAAGCAGTACAAGTGCCCTTCATGC  
953ann05.2 ACTCCAGCAAGAGCAGAGCACATTAAGCAGTACAAGTGCCCTTCATGC  
953ann06 ACTCCAGCAAGAGCAGAGCACATTAAGCAGTACAAGTGCCCTTCTTGC  
953ann06.2 ACTCCAGCAAGAGCAGAGCACATTAAGCAGTACAAGTGCCCTTCTTGC  
953ann07 ACTCCAGCAAGAGCAGAGCACATTAAGCAGTACAAGTGCCCTTCATGC  
953ann07.2 ACTCCAGCAAGAGCAGAGCACATTAAGCAGTACAAGTGCCCTTCATGC  
953ann08 ACTCCAGCAAGAGCAGAGCACATTAAGCAGTACAAGTGCCCTTCATGC  
953ann08.2 ACTCCAGCAAGAGCAGAGCACATTAAGCAGTACAAGTGCCCTTCATGC  
953ann10 ACTCCAGCAAGAGCAGAGCACATTAAGCAGTACAAGTGCCCTTCATGC  
953ann11 ACTCCAGCAAGAGCAGAGCACATTAAGCAGTACAAGTGCCCTTCATGC

953ann11.2 ACTCCAGCAAGAGCAGAGCACATTAAGCAGTACAAGTGCCCTTCATGC  
953ann12 ACTCCAGCAAGAGCAGAGCACATTAAGCAGTACAAGTGCCCTTCATGC  
953ann12.2 ACTCCAGCAAGAGCAGAGCACATTAAGCAGTACAAGTGCCCTTCATGC  
953pet01 ACTCCAGCAAGAGCAGAGCACATTAAGCAGTACAAGTGCCCTTCATGC  
953pet02 ACTCCAGCAAGAGCAGAGCACATTAAGCAGTACAAGTGCCCTTCATGC  
953pet05 ACTCCAGCAAGAGCAGAGCACATTAAGCAGTACAAGTGCCCTTCATGC  
953pet06 ACTCCAGCAAGAGCAGAGCACATTAAGCAGTACAAGTGCCCTTCATGC  
953pet07 ACTCCAGCAAGAGCAGAGCACATTAAGCAGTACAAGTGCCCTTCATGC  
953pet07.2 ACTCCAGCAAGAGCAGAGCACATTAAGCAGTACAAGTGCCCTTCATGC  
953pet08 ACTCCAGCAAGAGCAGAGCACATTAAGCAGTACAAGTGCCCTTCATGC  
953pet08.2 ACTCCAGCAAGAGCAGAGCACATTAAGCAGTACAAGTGCCCTTCATGC  
953pet09 ACTCCAGCAAGAGCAGAGCACATTAAGCAGTACAAGTGCCCTTCATGC  
953pet10 ACTCCAGCAAGAGCAGAGCACATTAAGCAGTACAAGTGCCCTTCATGC  
953pet10.2 ACTCCAGCAAGAGCAGAGCACATTAAGCAGTACAAGTGCCCTTCATGC  
953pet11 ACTCCAGCAAGAGCAGAGCACATTAAGCAGTACAAGTGCCCTTCATGC  
953ano01 ACTCCAGCAAGAGCAGAGCACATTAAGCAGTACAAGTGCCCTTCATGC  
953ano01.2 ACTCCAGCAAGAGCAGAGCACATTAAGCAGTACAAGTGCCCTTCATGC  
953ano04 ACTCCAGCAAGAGCAGAGCACATTAAGCAGTACAAGTGCCCTTCATGC  
953ano04.2 ACTCCAGCAAGAGCAGAGCACATTAAGCAGTACAAGTGCCCTTCATGC  
953ano05 ACTCCAGCAAGAGCAGAGCACATTAAGCAGTACAAGTGCCCTTCATGC  
953ano05.2 ACTCCAGCAAGAGCAGAGCACATTAAGCAGTACAAGTGCCCTTCATGC  
953ano06 ACTCCAGCAAGAGCAGAGCACATTAAGCAGTACAAGTGCCCTTCATGC  
953ano06.2 ACTCCAGCAAGAGCAGAGCACATTAAGCAGTACAAGTGCCCTTCATGC  
953ano07 ACTCCAGCAAGAGCAGAGCACATTAAGCAGTACAAGTGCCCTTCATGC

953ano07.2 ACTCCAGCAAGAGCAGAGCACATTAAGCAGTACAAGTGCCCTTCATGC  
953ano08 ACTCCAGCAAGAGCAGAGCACATTAAGCAGTACAAGTGCCCTTCATGC  
953ano08.2 ACTCCAGCAAGAGCAGAGCACATTAAGCAGTACAAGTGCCCTTCATGC  
953ano09 ACTCCAGCAAGAGCAGAGCACATTAAGCAGTACAAGTGCCCTTCATGC  
953ano10 ACTCCAGCAAGAGCAGAGCACATTAAGCAGTACAAGTGCCCTTCATGC  
953ano10.2 ACTCCAGCAAGAGCAGAGCACATTAAGCAGTACAAGTGCCCTTCATGC  
953ano11 ACTCCAGCAAGAGCAGAGCACATTAAGCAGTACAAGTGCCCTTCATGC  
953ano12 ACTCCAGCAAGAGCAGAGCACATTAAGCAGTACAAGTGCCCTTCATGC

953ann01 AGCAACAAAAGAGCCCGACCGTAA  
953ann02 AGCAACAAAAGAGCCCGACCGTAA  
953ann02.2 AGCAACAAAAGAGCCCGACCGTAA  
953ann04 AGCAACAAAAGAGCCCGGCCGTAA  
953ann05 AGCAACAAAAGAGCCCGACCGTAA  
953ann05.2 AGCAACAAAAGAGCCCGACCGTAA  
953ann06 AGCAACAAAAGAGCCCGACCGTAA  
953ann06.2 AGCAACAAAAGAGCCCGACCGTAA  
953ann07 AGCAACAAAAGAGCCCGACCGTAA  
953ann07.2 AGCAACAAAAGAGCCCGACCGTAA  
953ann08 AGCAACAAAAGAGCCCGACCGTAA  
953ann08.2 AGCAACAAAAGAGCCCGACCGTAA  
953ann10 AGCAACAAAAGAGCCCGACCGTAA  
953ann11 AGCAACAAAAGAGCCCGACCGTAA  
953ann11.2 AGCAACAAAAGAGCCCGACCGTAA

953ann12 AGCAACAAAAGAGCCCGACCGTAA  
953ann12.2 AGCAACAAAAGAGCCCGACCGTAA  
953pet01 AGCAACAAAAGAGCCCGACCGTAA  
953pet02 AGCAACAAAAGAGCCCGACCGTAA  
953pet05 AGCAACAAAAGAGCCCGACCGTAA  
953pet06 AGCAACAAAAGAGCCCGACCGTAA  
953pet07 AGCAACAAAAGAGCCCG{A,G}CCGTAA  
953pet07.2 AGCAACAAAAGAGCCCG{A,G}CCGTAA  
953pet08 AGCAACAAAAGAGCCCGACCGTAA  
953pet08.2 AGCAACAAAAGAGCCCGACCGTAA  
953pet09 AGCAACAAAAGAGCCCG{A,G}CCGTAA  
953pet10 AGCAACAAAAGAGCCCG{A,G}CCGTAA  
953pet10.2 AGCAACAAAAGAGCCCG{A,G}CCGTAA  
953pet11 AGCAACAAAAGAGCCCG{A,G}CCGTAA  
953ano01 AGCAACAAAAGAGCCCGACCGTAA  
953ano01.2 AGCAACAAAAGAGCCCGACCGTAA  
953ano04 AGCAACAAAAGAGCCCG{A,G}CCGTAA  
953ano04.2 AGCAACAAAAGAGCCCG{A,G}CCGTAA  
953ano05 AGCAACAAAAGAGCCCGACCGTAA  
953ano05.2 AGCAACAAAAGAGCCCGACCGTAA  
953ano06 AGCAACAAAAGAGCCCGACCGTAA  
953ano06.2 AGCAACAAAAGAGCCCGACCGTAA  
953ano07 AGCAACAAAAGAGCCCGACCGTAA  
953ano07.2 AGCAACAAAAGAGCCCGACCGTAA

953ano08 AGCAACAAAAGAGCCCGACCGTAA  
953ano08.2 AGCAACAAAAGAGCCCGACCGTAA  
953ano09 AGCAACAAAAGAGCCCGACCGTAA  
953ano10 AGCAACAAAAGAGCCCGACCGTAA  
953ano10.2 AGCAACAAAAGAGCCCGACCGTAA  
953ano11 AGCAACAAAAGAGCCCGACCGTAA  
953ano12 AGCAACAAAAGAGCCCGACCGTAA

;

END;

BEGIN CODONS;

CODONPOSSET \* UNTITLED = 1: 1 4 7 10 13 16 19 22 25 28 31 34 37 40 43 46 49 52  
55 58 61 64 67 70 73 76 79 82 85 88 91 94 97 100 103 106 109 112 115 118 121 124  
127 130 133 136 139 142 145 148 151 154 157 160 163 166, 2: 2 5 8 11 14 17 20 23  
26 29 32 35 38 41 44 47 50 53 56 59 62 65 68 71 74 77 80 83 86 89 92 95 98 101  
104 107 110 113 116 119 122 125 128 131 134 137 140 143 146 149 152 155 158 161  
164 167, 3: 3 6 9 12 15 18 21 24 27 30 33 36 39 42 45 48 51 54 57 60 63 66 69 72  
75 78 81 84 87 90 93 96 99 102 105 108 111 114 117 120 123 126 129 132 135 138  
141 144 147 150 153 156 159 162 165 168;

CODONPOSSET CodonPositions = 1: 1 4 7 10 13 16 19 22 25 28 31 34 37 40 43 46  
49 52 55 58 61 64 67 70 73 76 79 82 85 88 91 94 97 100 103 106 109 112 115 118  
121 124 127 130 133 136 139 142 145 148 151 154 157 160 163 166, 2: 2 5 8 11 14  
17 20 23 26 29 32 35 38 41 44 47 50 53 56 59 62 65 68 71 74 77 80 83 86 89 92 95  
98 101 104 107 110 113 116 119 122 125 128 131 134 137 140 143 146 149 152 155  
158 161 164 167, 3: 3 6 9 12 15 18 21 24 27 30 33 36 39 42 45 48 51 54 57 60 63  
66 69 72 75 78 81 84 87 90 93 96 99 102 105 108 111 114 117 120 123 126 129 132  
135 138 141 144 147 150 153 156 159 162 165 168;

CODESET \* UNTITLED = universal: 1 - 168;

END;

BEGIN MacClade;

Version 4.0 75;  
LastModified -1049639790;  
FileSettings editor '0' '0' '1' '1';

```
Singles 100;
Editor 010110011111111000100 '1' '12' Geneva '9' '100' '1' all;
EditorPosition '49' '85' '963' '1059';
TreeWindowPosition '40' '2' '984' '1274';
ListWindow Characters closed Geneva '9' '50' '10' '121' '399' 00;
ListWindow Taxa closed Geneva '9' '50' '10' '121' '490' 100;
ListWindow Trees closed Geneva '9' '50' '10' '276' '490';
ListWindow TypeSets closed Geneva '9' '50' '10' '276' '490';
ListWindow WtSets closed Geneva '9' '50' '10' '276' '490';
ListWindow ExSets closed Geneva '9' '50' '10' '276' '490';
ListWindow CharSets closed Geneva '9' '50' '10' '276' '490';
ListWindow TaxSets closed Geneva '9' '50' '10' '276' '490';
ListWindow NexusBlocks closed Geneva '9' '50' '10' '276' '490';
ChartWindowPosition '52' '30' '686' '964';
StateNamesSymbols closed Geneva '9' '10' '50' '30' '148' '220';
WindowOrder Data;
OtherSymbols & / 00 ? ;;
Correlation '0' '0' '1000' '0' '0' 10011010;
Salmo 00000001;
EditorFile '2';
ExportHTML _ MOSS '100' 110000;
PrettyPrint 10;
EditorToolsPosition '826' '61' '115' '165';
TreeWindowProgram 10;
TreeWindow 0000;
Continuous '0' '3' 1;
Calculations 0000001;
SummaryMode '0' '0' 0;
Charts Geneva '9' ( normal ) 0010;
NexusOptions '0' '0' '48' 101011001;
TipLabel '1';
TreeFont Geneva '9' ( normal );
TreeShape 1.0 1.0 1100;
TraceLabels 0101;
ChartColors '0' '0' '-1' '9' 11;
ChartBiggestSpot 1;
ChartPercent 10;
ChartBarWidth '10' 1;
ChartVerticalAxis 10101;
ChartMinMax '0';
TraceAllChangesDisplay '1' 1;
BarsOnBranchesDisplay '0' '0' '-5536' '10000' '10000' '10000' '10000' '-
5536' '-536' '-536' '-536' '6' '1' 0000101;
ContinuousBranchLabels 0;
AllStatesBranchLabels 1;
IndexNotation '2' 1;
PrintTree 10.00 '2' '2' '2' '2' '2' '2' '2' '2' '2' '2' '2' '2' Geneva '9' (
normal ) Geneva '10' ( normal ) Geneva '9' ( normal ) Geneva '9' ( normal )
```

```

Geneva '9' ( bold ) Geneva '9' ( normal ) Geneva '9' ( normal ) '0' '0' '0'
'0' '0' '0' '0' '0' '0' '0' '0' '0' '0' '0' '0' '0' '0' '0' '0' '0' '0' '0' '0'
'0' '0' '0' '0' '0' '0' '0' '0' '1' '1' '1' '1' '2032' '-23056' '-39' '4' '-40' '0'
'1' '2' '1' '8' '0' '0' '0' '2' 1000111000000000000100000111000;
  MatchChar 00 .;
  EntryInterpretation 01;
  ColorOptions 0;
  TreeTools '0' '5' '4' '0' '10' '4' '0' 00100111111101110;
  EditorTools '0' '0' '0' '1000' '0' '0' '6' '3' 000001011100001;
  PairAlign '2' '2' '3' '2' '1' '1' '2' '1' '3' 1010;
  BothTools '1';

END;
BEGIN ASSUMPTIONS;
  OPTIONS DEFTYPE = unord PolyTcount = MINSTEPS;
  TYPESET * UNTITLED = unord: 1 - 168;

END;

BEGIN MESQUITECHARMODELS;
  ProbModelSet * UNTITLED = 'Jukes-Cantor': 1 - 168;
END;

Begin MESQUITE;
  MESQUITESCRIPTVERSION 2;
  TITLE AUTO;
  tell ProjectCoordinator;
  getEmployee #mesquite.minimal.ManageTaxa.ManageTaxa;
  tell It;
    setID 0 1130423524284955192;
  endTell;
  getEmployee #mesquite.charMatrices.ManageCharacters.ManageCharacters;
  tell It;
    setID 0 1173825232391803518;
    checksum 0 3237999858;
  endTell;
  getEmployee
#mesquite.charMatrices.BasicDataWindowCoord.BasicDataWindowCoord;
  tell It;
    showDataWindow #1173825232391803518
#mesquite.charMatrices.BasicDataWindowMaker.BasicDataWindowMaker;
  tell It;
    getWindow;
  tell It;
    setSize 420 261;
    setLocation 60 10;
    setFont SanSerif;
    setFontSize 10;

```

```

        onInfoBar;
        setExplanationSize 30;
        setAnnotationSize 20;
        setFontIncAnnot 0;
        setFontIncExp 0;
        getToolPalette;
        tell It;
        endTell;
        setActive;
        setTool
mesquite.charMatrices.BasicDataWindowMaker.BasicDataWindow.arrow;
        colorCells
#mesquite.charMatrices.ColorByState.ColorByState;
        setBackground White;
        toggleShowNames on;
        toggleTight off;
        toggleShowChanges off;
        toggleSeparateLines off;
        toggleShowStates on;
        toggleAutoWCharNames off;
        toggleShowDefaultCharNames off;
        toggleConstrainCW on;
        toggleBirdsEye off;
        toggleColorsPanel off;
        birdsEyeWidth 2;
        toggleLinkedScrolling on;
        toggleScrollLinkedTables off;
    endTell;
    showWindow;
    getWindow;
    tell It;
        forceAutosize;
    endTell;
    getEmployee #mesquite.categ.StateNamesStrip.StateNamesStrip;
    tell It;
        showStrip off;
    endTell;
    getEmployee #mesquite.charMatrices.AnnotPanel.AnnotPanel;
    tell It;
        togglePanel off;
    endTell;
    getEmployee #mesquite.charMatrices.ColorCells.ColorCells;
    tell It;
        setColor Red;
        removeColor off;
    endTell;
    getEmployee
#mesquite.charMatrices.QuickKeySelector.QuickKeySelector;

```

```
        tell It;
            autotabOff;
        endTell;
        getEmployee #mesquite.align.AlignToDropped.AlignToDropped;
        tell It;
            gapCosts 8 3;
        endTell;
    endTell;
endTell;
endTell;
end;
```
