# Supplementary material
Source: PubMed Central journal article supplement (PMC2467390)
Supplement: NIHMS55621-supplement-s3.pdf [file NIHMS55621-supplement-s3.pdf]

#NEXUS

[MacClade 4.0 registered to Michael Moody, Uconn]

BEGIN TAXA;

TITLE Untitled\_Taxa\_Block;

DIMENSIONS NTAX=57;

TAXLABELS

998ann01

998ann01.2

998ann02

998ann02.2

998ann04

998ann06

998ann09

998ann09.2

998ann10

998ann11

998ann11.2

998ann03

998ann03.2

998ann05

998ann05.2

998ann07

998ann07.2

998ann08

998ann08.2

998ann12

998ann12.2

998ano2.4

998ano2.7

998ano3

998ano04

998ano04.2

998ano5.1

998ano5.2

998ano06

998ano7

998ano7.2

998ano8.1

998ano8.6

998ano09

998ano09.2

998ano10

998ano11

998ano11.2

998ano12.4

998ano12.2

998pet01  
998pet01.2  
998pet02  
998pet03  
998pet03.2  
998pet04  
998pet04.2  
998pet05  
998pet05.2  
998pet06  
998pet06.2  
998pet07.2  
998pet08  
998pet08.2  
998pet11.7  
998pet12  
998pet12.2;

END;

BEGIN CHARACTERS;  
TITLE Untitled\_Character\_Matrix;  
DIMENSIONS NCHAR=699;  
FORMAT DATATYPE=DNA MISSING=? GAP=: ;

MATRIX

| [   | 10  | 20  | 30  | 40  | 50  | 60  |     |
|-----|-----|-----|-----|-----|-----|-----|-----|
| 70  | 80  | 90  | 100 | 110 | 120 | 130 | 140 |
| 150 | 160 | 170 | 180 | 190 | 200 | 210 | 220 |
| 230 | 240 | 250 | 260 | 270 | 280 | 290 | 300 |
| 310 | 320 | 330 | 340 | 350 | 360 | 370 | 380 |
| 390 | 400 | 410 | 420 | 430 | 440 | 450 | 460 |
| 470 | 480 | 490 | 500 | 510 | 520 | 530 | 540 |
| 550 | 560 | 570 | 580 | 590 | 600 | 610 | 620 |
| 630 | 640 | 650 | 660 | 670 | 680 | 690 | ]   |
| [   | .   | .   | .   | .   | .   | .   | .   |
| .   | .   | .   | .   | .   | .   | .   | .   |
| .   | .   | .   | .   | .   | .   | .   | .   |
| .   | .   | .   | .   | .   | .   | .   | .   |
| .   | .   | .   | .   | .   | .   | .   | .   |
| .   | .   | .   | .   | .   | .   | .   | .   |
| .   | .   | .   | .   | .   | .   | .   | .   |
| .   | .   | .   | .   | .   | .   | .   | ]   |

998ann01

CTCGTTTACATCTCCGGCGCTGCCAACACTCAGAAGCTCAAAACCCCGGTTACAAAAGACGGCGGTTCCGACCCCTCATG  
GAATTTTCCAATGAAGTTCACCGTTGATGAAGCCGCCGGATTACAGAACCGTCTTACTCTTGTGTGGAGATTAACATG  
ACGGGACGTTTGGCGATAAGGACGTTGGACTCGCCCATGTCCCGATTAAAGAGTTGTTAGACGGGTTATCGAAAGACGGG

ACGTCCGAGAAGCAAGTTAGTTATCAGGTCAGGACTCCCTCCGGAAAGCAGAAAGGGAGTCTGAATTTTTTCGTATAAATT  
TGGGGAGAAGTTTACTGCAAAGGCGGTGGAGGAGGCGGTTACTGCTTATCCT:::GCTGGTATGGTTGTTGGTTCAA  
GTTCTGGATACCAACAGCCATATGCTGCTACGCCTGGTGGGTATTACCCACCAGGCGCTGCTGGCGGATAACCTCCTCAG  
CCACAGCCTGGATATGCGTAT::CAACAACAACCAGGCTATGGTTATCCTCCCCACCACCCCCAGGGTACGCTGGGTA  
CCCTCCACAACAACCAGGATATGGGTATCCGCCAGTCCAGCAGCCACAACAAAAGCCAAAGAAGAATGGACTTGGTATGG  
GGTGGGAGCTGGTTTGTCTAGGAGGTGCACTTGGTGGACTGTTGATTGCGGATATCGCC [690]

998ann01.2

CTCGTTTACATCTCCGGCGCTGCCAACACTCAGAAGCTCAAACCCCGGTTACAAAAGACGGCGGTTCCGACCCCTCATG  
GAATTTTCCAATGAAGTTCACCGTTGATGAAGCCGCCGGATTACAGAACCGTCTTACTCTTGTGTGGAGATTAAACACG  
ACGGGACGTTTGGCGATAAGGACGTTGGACTCGCCCATGTCCCGATCAAAGAGTTGTTAGACGGATTATCGAAAGACGGG  
ACGTCCGAGAAGCAAGTTAGTTATCAGGTCAGGACTCCCTCCGGAAAGCAGAAAGGGAGTCTGAATTTTTTCGTATAAATT  
TGGGGAGAAGTTTACTGCAAAGGCGGTGGAGGAGGCGGTTACTGCTTATCCT:::GCTGGTATGGCTGTTGGTTCAA  
GTTCTGGATACCAACAGCCATATGCTGCTGCGCCTGGTGGGTATTACCCACCAGGCGCTGCTGGCGGATAACCTCCTCAG  
CCACAGCCTGGATATGCGTAT::CAACAACAACCAGGCTATGGTTATCCTCCCCACCACCCCCAGGGTACGCTGGGTA  
CCCTCCACAACAACCAGGATATGGGTATCCGCCAGTCCAGCAGCCACAACAAAAGCCAAAGAAGAATGGACTTGGTATGG  
GGTGGGAGCTGGTTTGTCTAGGAGGTGCACTTGGTGGACTGTTGATTGCGGATATCGCC [690]

998ann02

CTCGTTTACATCTCCGGCGCTGCCAACAGTCAAAGCTCAAACCCCGGTTACAAAAGACGGCGGTTCCGACCCCTCATG  
GAATTTTCCAATGAAGTTCACCGTTGATGAAGCCGCCGGATTACAGAACCGTCTTACTCTTGTGTGGAGATTAAACACG  
ACGGGACGTTTGGCGATAAGGACGTTGGAATCGCCCATGTCCCGATCAAAGAGTTGTTGGATGGATTATCGAAAGACGGG  
ACGTCTGAGAAGCAAGTTAGTTATCAAGTTAGGACTCCCTCAGGAAAACAGAAAGGGAGTCTGAATTTTTTCGTATAAATT  
TGGGGAGAAGTTTACTGCAAAGATGGTGGAGGAGGCGGTTACTGCTTATCCT:::GCTGGTATGGCTGTTGGTTCAA  
GTTCTGGATACCAACAGCCATATGCTGCTGCGCCTGGTGGGTATTACCCACCAGGTGCTGCTGGCGGATAACCCACCTCAG  
CCACAGCCTGGATATGCGTAT::CAACAACAACCAGGCTATGGTTATCCTCCCCACCACCTCCAGGGTACGCTGGGTA  
CCCTCCACAACAACCAGGATATGGGTATCCGCCA:::::::::::::::::::  
:::::::::::::::::: [585]

998ann02.2

CTCGTTTACATCTCCGGCGCTGCCAACACTCAGAAGCTCAAACCCCGGTTACAAAAGACGGCGGTTCCGACCCCTCATG  
GAATTTTCCAATGAAGTTCACCGTTGATGAAGCCGCCGGATTACAGAACCGTCTTACTCTTGTGTGGAGATTAAACACG  
ACGGGACGTTTGGCGATAAGGACGTTGGACTCGCCCATGTGCCGATCAAAGAGTTGTTAGACGGATTATCGAAAGACGGG  
ACGTCCGAGAAGCAAGTTAGTTATCAGGTCAGGACTCCCTCCGGAAAGCAGAAAGGGAGTCTGAATTTTTTCGTATAAATT  
TGGGGAGAAGTTTACTGCAAAGGCGGTGGAGGAGGCGGTTACTGCTTATCCT:::GCTGGTATGGTTGTTGGTTCAA  
GTTCTGGATACCAACAGCCATATGCTGCTGCGCCTGGTGGGTATTACCCACCAGGTGCTGCTGGCGGATAACCCACCTCAG  
CCACAGCCTGGATATGCGTAT::CAACAACAACCAGGCTATGGTTATCCTCCCCACCACCCCCAGGGTACGCTGGGTA  
CCCTCCACAACAACCAGGATATGGGTATCCGCCA:::::::::::::::::::  
:::::::::::::::::: [585]

998ann04

CTCGTTTACATCTCCGGCGCTGCGAACACTCAGAAGCTCAAACCCCGGTTACAAAAGACGGCGGTTCCGACCCCTCATG  
GAATTTTCCAATGAAGTTCACCGTTGATGAAGCCGCCGGATTACAAAACCGTCTTACTCTTGTGTGGAGATTAAACACG  
ACGGGACGTTTGGCGATAAGGACGTTGGACTTGCCCATGTGCCGATCAAAGAGTTGTTAGACGGATTATCGAAAGACGGG  
ACGTCCGAGAAGCAAGTTAGTTATCAGGTCAGGACCCCTCCGGAAAGCAGAAAGGGAGTCTGAATTTTTTCGTATAAAGTT  
TGGGGAGAAGTTTACTGCAAAGGTGGTGGAGGAGGCGGTTACTGCTTATCCT:::GCTGGTATGGCTGTTGGTTCAA  
GTTCTGGATACCAACAGCCATATGGTGTGCTGCGCCTGGTGGGTATTACCCACCAGGTGCTGCTGGCGGATAACCCACCTCAA  
CCACAGCCTGGATATGCGTATCAACAACAACAACCAGGCTATGGTTATCCTCCCCACCACCCCCAGGGTACGCTGGGTA  
CCCTCCACAACAACCAGGATATGGGTATCCGCCAGTCCAGCAGCCACAACAGCCTCCAAAGAAGAATGGGCTTGGTATGG  
GGTGGGAGCTGGTTTGTCTAGGAGGTGCACTCGGTGGGCTGTTGATTGCGGATATCGCC [693]

998ann06

CTCGTTTACATCTCCGGCGCTGCGAACACTCAGAAGCTCAAACCCCGGTTACAAAAGACGGCGGTTCCGACCCCTCATG

GAATTTCCAATGAAGTTCACCGTTGATGAAGCCGCCGGATTACAGAACCGTCTTACTCTTGTGTGGAGATTAACACG  
ACGGGACGTTTGGCGATAAGGACGTTGGAATCGCCCATGTGCCGATCAAAGAGTTGTTGGATGGATTATCGAAAGACGGG  
ACGTCCGAGAAGCAAGTTAGTTATCAAGTTAGGACTCCCTCCGGAAAACAGAAAGGGAGTCTGAATTTTTCGTATAAATT  
TGGGGAGAAGTTTACTGCAAAGATGGTGGAGGAGGCGGTTACTGCTTATCCT: : : : :GCTGGTATGGCTGTTGGTTCAA  
GTTCTGGATACCAACAGCCATATGCTGCTGCGCCTGGTGGGTATTACCCACCAGGTGCTGCTGGCGGATAACCCACCTCAG  
CCACAGCCTGGATATGCGTAT: : :CAACAACAACCAGGCTATGGTTATCCTCCCCACCACCCCAGGGTACGCTGGGTA  
CCCTCCACAACAACCAGGATATGGGTATCCGCCAGTCCAGCAGCCACAACAAAAGCCAAAGAAGAATGGACTTGGTATGG  
GGTTGGGAGCTGGTTTGTCTAGGAGGTGCACCTGGTGGGCTGTTGATTGCGGATATCGCC [ 690 ]

998ann09

CTGGTTTACATCTCCGGCGCTGCGAACACTCAGAAGCTCAAACCCCGGTTACAAAGACGGCGGTTCCGACCCCTCATG  
GAATTTTCCAATGAAGTTCACCGTGGATGAAGCCGCCGGATTACAGAACCGTCTTACTCTTGTGTGGAGATTAACACG  
ACGGGACGTTTGGTGATAAGGACGTTGGAATCGCCCATGTGCCGATCAAAGAGTTGTTAGACGGATTATCGAAAGACGGG  
ACGTCCGAGAAGCAAGTTAGTTATCAGGTCAGGACCCCTCCGGGAAGCAGAAGGGGAGTCTGAATTTTTCGTATAAATT  
TGGGGAGAAGTTTACTGCAAAGGCGGTGGAGGAGGCGGTTACTGCTTATCCT: : : : :GCTGGTATGGTTGTTGGTTCAA  
GTTCTGGATACCAACAACCATATGCTGCTGCGCCTGGTGGGTATTACCCACCAGGCGCTGCTGGCGGATAACCTCCTCAG  
CCACAGCCTGGATATGCGTAT: : :CAACAACAACCAGGCTATGGTTATCCTCCCCACCACCCCAGGGTACGCTGGGTA  
CCCTCCACAACAACCAGGATATGGGTATCCGCCAGTCCAGCAGCCACAACAAAAGCCAAAGAAGAATGGACTTGGTATGG  
GGTTGGGAGCTGGTTTGTCTAGGAGGTGCACCTGGTGGGCTGTTGATTGCGGATATCGCC [ 690 ]

998ann09.2

CTCGTTTACATCTCCGGCGCTGCCAACACTCAGAAGCTCAAACCCCGGTTACAAAGACGGCGGTTCCGACCCCTCATG  
GAATTTTCCAATGAAGTTCACCGTGGATGAAGCCGCCGGATTACAGAACCGTCTTACTCTTGTGTGGAGATTAACACG  
ACGGGACGTTTGGCGATAAGGACGTTGGACTCGCCCATGTCCCGATCAAAGAGTTGTTAGACGGATTATCGAAAGACGGG  
ACGTCCGAGAAGCAAGTTAGTTATCAGGTCAGGACTCCCTCCGGAAAGCAGAAGGGGAGTCTGAATTTTTCGTATAAATT  
TGGGGAGAAGTTTACTGCAAAGGCGGTGGAGGAGGCGGTTACTGCTTATCCT: : : : :GCTGGTATGGCTGTTGGTTCAA  
GTTCTGGATACCAACAGCCATATGCTGCTGCGCCTGGTGGGTATTACCCACCAGGCGCTGCTGGCGGATAACCTCCTCAG  
CCACAGCCTGGATATGCGTAT: : :CAACAACAACCAGGCTATGGTTATCCTCCCCACCACCCCAGGGTACGCTGGGTA  
CCCTCCACAACAACCAGGATATGGGTATCCGCCAGTCCAGCAGCCACAACAAAAGCCAAAGAAGAATGGACTTGGTATGG  
GGTTGGGAGCTGGTTTGTCTAGGAGGTGCACCTGGTGGGCTGTTGATTGCGGATATCGCC [ 690 ]

998ann10

CTGGTTTACATCTCCGGCGCTGCGAACACTCAGAAGCTCAAACCCCGGTTACAAAGACGGCGGTTCCGACCCCTCATG  
GAATTTTCCAATGAAGTTCACCGTGGATGAAGCCGCCGGATTACAGAACCGTCTTACTCTTGTGTGGAGATTAACACG  
ACGGGACGTTTGGTGATAAGGACGTTGGACTCGCCCATGTGCCGATCAAAGAGTTGTTAGACGGATTATCGAAAGACGGG  
ACGTCCGAGAAGCAAGTTAGTTATCAGGTCAGGACTCCCTCCGGGAAGCAGAAGGGGAGTCTGAATTTTTCGTATAAATT  
TGGGGAGAAGTTTACTGCAAAGGCGGTGGAGGAGGCGGTTACTGCTTATCCT: : : : :GCTGGTATGGCTGTTGGTTCAA  
GTTCTGGATACCAACAGCCATATGCTGCTGCGCCTGGTGGGTATTACCCACCAGGCGCTGCTGGCGGATAACCTCCTCAG  
CCACAGCCTGGATATGCGTAT: : :CAACAACAACCAGGCTATGGTTATCCTCCCCACCACCCCAGGGTACGCTGGGTA  
CCCTCCACAACAACCAGGATATGGGTATCCGCCAGTCCAGCAGCCACAACAAAAGCCAAAGAAGAATGGACTTGGTATGG  
GGTTGGGAGCTGGTTTGTCTAGGAGGTGCACCTGGTGGGCTGTTGATTGCGGATATCGCC [ 690 ]

998ann11

CTGGTTTACATCTCCGGCGCTGCGAACACTCAGAAGCTCAAACCCCGGTTACAAAGACGGCGGTTCCGACCCCTCATG  
GAATTTTCCAATGAAGTTCACCGTGGATGAAGCCGCCGGATTACAAAACCGTCTTACTCTTGTGTGGAGATTAACACG  
ACGGGACGTTTGGTGATAAGGACGTTGGACTTGCCCATGTGCCGATCAAAGAGTTGTTAGACGGATTATCGAAAGACGGG  
ACGTCCGAGAAGCAAGTTAGTTATCAGGTCAGGACCCCTCCGGGAAGCAGAAGGGGAGTCTGAATTTTTCGTATAAATT  
TGGGGAGAAGTTTACTGCAAAGGCGGTGGAGGAGGCGGTTACTGCTTATCCT: : : : :GCTGGTATGGCTGTTGGTTCAA  
GTTCTGGATACCAACAGCCATATGCTGCTGCGCCTGGTGGGTATTACCCACCAGGTGCTGCTGGCGGATAACCCACCTCAG  
CCACAGCCTGGATATGCGTAT: : :CAACAACAACCAGGCTATGGTTATCCTCCCCACCACCCCAGGGTACGCTGGGTA  
CCCTCCACAACAACCAGGATATGGGTATCCGCCAGTCCAGCAGCCACAACAGCCTCCAAAGAAGAATGGGCTTGGTATGG  
GGTTGGGAGCTGGTTTGTCTAGGAGGTGCACCTCGGTGGGCTGTTGATTGCGGATATCGCC [ 690 ]

998ann11.2

CTCGTTTACATCTCCGGCGCTGCGAACACTCAGAAGCTCAAAACCCCGGTTACAAAAGACGGCGGTTCCGACCCCTCATG  
GAATTTTCCAATGAAGTTCACCGTTGATGAAGCCGCCGGATTACAGAACCGTCTTACTCTTGTGTTGTGGAGATTAAACACG  
ACGGGACGTTTGGCGATAAGGACGTTGGACTCGCCCATGTCCCGATCAAAGAGTTGTTAGACGGATTATCGAAAGACGGG  
ACGTCCGAGAAGCAAGTTAGTTATCAGGTCAGGACTCCCTCCGGAAAGCAGAAAGGGAGTCTGAATTTTTCGTATAAATT  
TGGGGAGAAGTTTACTGCAAAGGCGGTGGAGGAGGCGGTTACTGCTTATCCT:::GCTGGTATGGCTGTTGGTTCAA  
GTTCTGGATACCAACAGCCATATGCTGCTGCGCCTGGTGGGTATTACCCACCAGGTGCTGCTGGCGGATAACCCACCTCAG  
CCACAGCCTGGATATGCGTAT:::CAACAACAACCAGGCTATGGTTATCCTCCCCACCACCCCCAGGGTACGCTGGGTA  
CCCTCCACAACAACCAGGATATGGGTATCCGCCAGTCCAGCAGCCACAACAAAAGCCAAAGAAGAATGGACTTGGTATGG  
GGTTGGGAGCTGGTTTGTAGGAGGTGCACTTGGTGGGCTGTTGATTGCGGATATCGCC [690]

998ann03

CTCGTTTACATCTCCGGCGCTGCCAACAGTCAAAAGCTCAAAACCCCGGTTACAAAAGACGGCGGTTCCGACCCCTCATG  
GAATTTTCCAATGAAGTTCACCGTCGATGAAGCCGCCGGATTACAGAACCGTCTTACTCTTGTGTTGTGGAGATTAAACACG  
ACGGGACGTTTGGCGATAAGGACGTTGGACTCGCCCATGTCCCGATCAAAGAGTTGTTGGACGGATTATCGAAAGACGGG  
ACGTCTGAGAAGCAAGTTAGTTATCAGGTCAGGACTCCCTCAGGAAAGCAGAAAGGGAGTCTGAATTTTTCGTATAAATT  
TGGGGAGAAGTTTACTGCAAAGGCGGTGGAGGAGGCGGTTACTGCTTATCCT:::GCTGGTATGGTTGTTGGTTCAA  
GTTCTGGATACCAACAGCCATATGCTGCTGCGCCTGGTGGGTATTACCCACCATGCGCTGCTGGCGGATAACCCACCTCAG  
CCACAGCCTGGATATGCGTAT:::CAACAACAACCAGGCTATGGTTATCCTCCCCACCACCTCCAGGGTACGCTGGGTA  
CCCTCCACAACAACCAGGATATGGGTATCCGCCAGTCCAGCAGCCACAACAAAAGCCAAAGAAGAATGGGCTTGGTATGG  
GGTTGGGAGCTGGTTTGTAGGAGGTGCACTTGGTGGGCTGTTGATTGCGGATATCGCC [690]

998ann03.2

CTCGTTTACATCTCCGGCGCTGCCAACACTCAGAAGCTCAAAACCCCGGTTACAAAAGACGGCGGTTCCGACCCCTCATG  
GAATTTTCCAATGAAGTTCACCGTTGATGAAGCCGCCGGATTACAGAACCGTCTTACTCTTGTGTTGTGGAGATTAAACACG  
ACGGGACGTTTGGCGATAAGGACGTTGGACTCGCCCATGTCCCGATCAAAGAGTTGTTAGACGGATTATCGAAAGACGGG  
ACGTCCGAGAAGCAAGTTAGTTATCAGGTCAGGACTCCCTCCGGAAAGCAGAAAGGGAGTCTGAATTTTTCGTATAAATT  
TGGGGAGAAGTTTACTGCAAAGGCGGTGGAGGAGGCGGTTACTGCTTATCCT:::GCTGGTATGGTTGTTGGTTCAA  
GTTCTGGATACCAACAGCCATATGCTGCTGCGCCTGGTGGGTATTACCCACCATGCTGCTGCTGGCGGATAACCCCTCCTCAG  
CCACAGCCTGGATATGCGTAT:::CAACAACAACCAGGCTATGGTTATCCTCCCCACCACCCCCAGGGTACGCTGGGTA  
CCCTCCACAACAACCAGGATATGGGTATCCGCCAGTCCAGCAGCCACAACAAAAGCCAAAGAAGAATGGACTTGGTATGG  
GGTTGGGAGCTGGTTTGTAGGAGGTGCACTTGGTGGGCTGTTGATTGCGGATATCGCC [690]

998ann05

CTCGTTTACATCTCCGGCGCTGCGAACAGTCAAAAGCTCAAAACCCCGGTTACAAAAGACGGCGGTTCCGACCCCTCATG  
GAATTTTCTATGAAGTTCACCGTTGATGAAGCCGCCGGATTACAGAACCGTCTTACTCTTGTGTTGTGGAGATTAAACACG  
ACGGGACGTTTGGCGATAAGGACGTTGGAATCGCCCATGTGCCGATCAAAGAGTTGTTAGACGGGTTATCGAAGGACGGG  
ACGTCCGAGAAGCAAGTTAGTTATCAGGTCAGGACCCCTCCGGAAAGCAGAAAGGGAGTCTGAATTTTTCGTATAAATT  
TGGGGAGAAGTTTACTGCAAAGGTGGTGGAGGAGGCGGTTACTGCTTATCCT:::GCTGGTATGGCTGTTGGTTCAA  
GTTCTGGATACCAACAGCCATATGTTGCTACGCCTGGTGGGTATTACCCACCAGGCGCTGCTGGCGGATAACCCCTCCTCAG  
CCACAACCTGGATATGCGTAT:::CAACAACAACCAGGCTATGGTTATCCTCCCCACCACCCCCAGGGTACGCTGGGTA  
CCCTCCACAACAACCAGGATATGGGTATCCGCCAGTCCAGCAGCCACAACAAAAGCCAAAGAAGAATGGACTTGGTATGG  
GGTTGGGAGCTGGTTTGTAGGAGGTGCACTTGGTGGGCTGTTGATTGCGGATATCGCC [690]

998ann05.2

CTCGTTTACATCTCCGGCGCTGCCAACACTCAGAAGCTCAAAACCCCGGTTACAAAAGACGGCGGTTCCGACCCCTCATG  
GAATTTTCCAATGAAGTTCACCGTTGATGAAGCCGCCGGATTACAGAACCGTCTTACTCTTGTGTTGTGGAGATTAAACACG  
ACGGGACGTTTGGCGATAAGGACGTTGGACTCGCCCATGTCCCGATCAAAGAGTTGTTAGACGGATTATCGAAAGACGGG  
ACGTCCGAGAAGCAAGTTAGTTATCAGGTCAGGACCCCTCCGGAAAGCAGAAAGGGAGTCTGAATTTTTCGTATAAATT  
TGGGGAGAAGTTTACTGCAAAGGCGGTGGAGGAGGCGGTTACTGCTTATCCT:::GCTGGTATGGCTGTTGGTTCAA  
GTTCTGGATACCAACAGCCATATGCTGCTGCGCCTGGTGGGTATTACCCACCAGGTGCTGCTGGCGGATAACCCCTCCTCAG  
CCACAGCCTGGATATGCGTAT:::CAACAACAACCAGGCTATGGTTATCCTCCCCACCACCCCCAGGGTACGCTGGGTA

CCCTCCACAACAACCAGGATATGGGTATCCGCCAGTCCAGCAGCCACAACAAAAGCCAAAGAAGAATGGACTTGGTATGG  
GGTTGGGAGCTGGTTTTGCTAGGAGGTGCACCTTGGTGGGCTGTTGATTGCGGATATCGCC [ 690 ]

998ann07

CTCGTTTACATCTCCGGCGCTGCCAACAGTCAGAAGCTCAAACCCCGGTTACAAAGACGGCGGTTCCGACCCCTCATG  
GAATTTTCCATGAAGTTCACCGTCGATGAAGCCGCCGGATTACAGAACCGTCTTACTCTTGTGTGGAGATTAAACACG  
ACGGGACGTTTGGCGATAAGGACGTTGGAATCGCCCATGTGCCGATCAAAGAGTTGTTGGATGGATTATCGAAGGACGGG  
ACGTCTGAGAAGCAAGTTAGTTATCAGGTCAGGACCCCCTCAGGAAAGCAGAAAGGGAGTCTGAATTTTTTCGTATAAATT  
TGGGGAGAAGTTTACTGCAAAGGCGGTGGAGGAGGCGGTTACTGCTTATCCT:::GCTGGTATGGCTGTTGGTTCAA  
GTTCTGGATACCAACAGCCATATGCTGCTGCGCCTGGTGGGTATTACCCACCAGGTGCTGCTGGCGGATAACCCACCTCAG  
CCACAACCTGGATATGCGTAT:::CAACAACAACCAGGCTATGGTTATCCTCCCCACCACCCCAGGGTACGCTGGGTA  
CCCTCCACAACAACCAGGATATGGGTATCCGCCAGTCCAGCAGCCACAACAAAAGCCAAAGAAGAATGGACTTGGTATGG  
GGTTGGGAGCTGGTTTTGCTAGGAGGTGCACCTTGGTGGGCTGTTGATTGCGGATATTGCC [ 690 ]

998ann07.2

CTCGTTTACATCTCCGGCGCTGCCAACACTCAGAAGCTCAAACCCCGGTTACAAAGACGGCGGTTCCGACCCCTCATG  
GAATTTTCCAATGAAGTTCACCGTTGATGAAGCCGCCGGATTACAGAACCGTCTTACTCTTGTGTGGAGATTAAACACG  
ACGGGACGTTTGGCGATAAGGACGTTGGAATCGCCCATGTGCCGATCAAAGAGTTGTTGGATGGATTATCGAAAGACGGG  
ACGTCCGAGAAGCAAGTTAGTTATCAGGTCAGGACTCCCTCCGAAAGCAGAAAGGGAGTCTGAATTTTTTCGTATAAATT  
TGGGGAGAAGTTTACTGCAAAGGCGGTGGAGGAGGCGGTTACTGCTTATCCT:::GCTGGTATGGCTGTTGGTTCAA  
GTTCTGGATACCAACAGCCATATGCTGCTGCGCCTGGTGGGTATTACCCACCAGGTGCTGCTGGCGGATAACCCCTCCTCAG  
CCACAGCCTGGATATGCGTAT:::CAACAACAACCAGGCTATGGTTATCCTCCCCACCACCCCAGGGTACGCTGGGTA  
CCCTCCACAACAACCAGGATATGGGTATCCGCCAGTCCAGCAGCCACAACAAAAGCCAAAGAAGAATGGACTTGGTATGG  
GGTTGGGAGCTGGTTTTGCTAGGAGGTGCACCTTGGTGGGCTGTTGATTGCGGATATCGCC [ 690 ]

998ann08

CTGGTTTACATCTCCGGCGCTGCGAACACTCAGAAGCTCAAACCCCGGTTACAAAGATGGCGGTTCCGACCCCTCATG  
GAATTTTCCAATGAAGTTCACCGTTGATGAAGCCGCCGGATTACAGAACCGTCTTACTCTTGTGTGGAGATTAAACACG  
ACGGGACGTTTGGCGATAAGGACGTTGGAATCGCCCATGTGCCGATCAAAGAGTTGTTGGATGGATTATCGAAAGACGGG  
ACGTCCGAGAAGCAAGTTAGTTATCAAGTTAGGACTCCCTCCGAAACAGAAAGGGAGTCTGAATTTTTTCGTATAAATT  
TGGGGAGAAGTTTACTGCAAAGGCGGTGGAGGAGGCGGTTACTGCTTATCCT:::GCTGGTATGGTTGTTGGTTCAA  
GTTCTGGATACCAACAGCCATATGGTGTGCTGCGCCTGGTGGGTATTACCCACCAGGTGCTGCTGGCGGATAACCCCTCCTCAG  
CCACAGCCTGGATATGCGTAT:::CAACAACAACCAGGCTATGGTTATCCTCCCCACCACCCCAGGGTACGCTGGGTA  
CCCTCCACAACAACCAGGATATGGGTATCCGCCAGTCCAGCAGCCACAACAAAAGCCAAAGAAGAATGGACTTGGTATGG  
GGTTGGGAGCTGGTTTTGCTAGGAGGTGCACCTTGGTGGGCTGTTGATTGCGGATATCGCC [ 690 ]

998ann08.2

CTCGTTTACATCTCCGGCGCTGCGAACACTCAGAAGCTCAAACCCCGGTTACAAAGACGGCGGTTCCGACCCCTCATG  
GAATTTTCCAATGAAGTTCACCGTTGATGAAGCCGCCGGATTACAGAACCGTCTTACTCTTGTGTGGAGATTAAACACG  
ACGGGACGTTTGGCGATAAGGACGTTGACTCGCCCATGTCCCGATCAAAGAGTTGTTAGACGGATTATCGAAAGACGGG  
ACGTCCGAGAAGCAAGTTAGTTATCAGGTCAGGACTCCCTCCGAAAGCAGAAAGGGAGTCTGAATTTTTTCGTATAAATT  
TGGGGAGAAGTTTACTGCAAAGGCGGTGGAGGAGGCGGTTACTGCTTATCCT:::GCTGGTATGGTTGTTGGTTCAA  
GTTCTGGATACCAACAGCCATATGCTGCTGCGCCTGGTGGGTATTACCCACCAGGCGCTGCTGGCGGATAACCCCTCCTCAG  
CCACAGCCTGGATATGCGTAT:::CAACAACAACCAGGCTATGGTTATCCTCCCCACCACCCCAGGGTACGCTGGGTA  
CCCTCCACAACAACCAGGATATGGGTATCCGCCAGTCCAGCAGCCACAACAAAAGCCAAAGAAGAATGGACTTGGTATGG  
GGTTGGGAGCTGGTTTTGCTAGGAGGTGCACCTTGGTGGGCTGTTGATTGCGGATATCGCC [ 690 ]

998ann12

CTCGTTTACATCTCCGGCGCTGCCAACACTCAGAAGCTCAAACCCCGGTTACAAAGACGGCGGTTCCGACCCCTCATG  
GAATTTTCCAATGAAGTTCACCGTTGATGAAGCCGCCGGATTACAGAACCGTCTTACTCTTGTGTGGAGATTAAACACG  
ACGGGACGTTTGGCGATAAGGACGTTGACTCGCCCATGTCCCGATCAAAGAGTTGTTGGACGGATTATCGAAAGACGGG  
ACGTCCGAGAAGCAAGTTAGTTATCAGGTCAGGACCCCCTCCGAAAGCAGAAAGGGAGTCTGAATTTTTTCGTATAAATT  
TGGGGAGAAGTTTACTGCAAAGGCGGTGGAGGAGGCGGTTACTGCTTATCCT:::GCTGGTATGGTTGTTGGTTCAA

GTTCTGGATACCAACAACCATATGCTGCTGCGCCTGGTGGGTATTACCCACCAGGTGCTGCTGGCGGATAACCCACCTCAG  
CCACAGCCTGGATATGCTTAT::CAACAACAACCAGGCTATGGTTATCCTCCCCACCACCCCAGGGTACGCTGGGTA  
CCCTCCACAACAACCAGGATATGGGTATCCGCCAGTCCAGCAGCCACAACAAAAGCCAAAGAAGAATGGACTTGGTATGG  
GGTTGGGAGCTGGTTTGCTAGGAGGTGCACTTGGTGGGCTGTTGATTGCGGATATCGCC [690]

998ann12.2

CTCGTTTACATCTCCGGCGCTGCCAACACTCAGAAGCTCAAAACCCCGGTTACAAAAGACGGCGGTTCCGACCCCTCATG  
GAATTTCCCAATGAAGTTCACCGTTGATGAAGCCGCCGGATTACAGAACCGTCTTACTCTTGTGTTGGAGATTAAACACG  
ACGGGACGTTTGGCGATAAGGACGTTGGACTCGCCCATGTCCCGATCAAAGAGTTGTTAGACGGATTATCGAAAGACGGG  
ACGTCCGAGAAGCAAGTTAGTTATCAGGTCAGGACCCCCTCCGGAAAGCAGAAAGGGAGTCTGAATTTTTTCGTATAAGTT  
TGGGGAGAAGTTTACTGCAAAGGCGGTGGAGGAGGCGGTTACTGCTTATCCT:::GCTGGTATGGTTGTTGGTTCAA  
GTTCTGGATACCAACAGCCATATGCTGCTGCGCCTGGTGGGTATTACCCACCAGGCGCTGCTGGCGGATAACCCACCTCAG  
CCACAGCCTGGATATGCGTAT::CAACAACAACCAGGCTATGGTTATCCTCCCCACCACCCCAGGGTACGCTGGGTA  
CCCTCCACAACAACCAGGATATGGGTATCCGCCAGTCCAGCAGCCACAACAAAAGCCAAAGAAGAATGGACTTGGTATGG  
GGTTGGGAGCTGGTTTGCTAGGAGGTGCACTTGGTGGGCTGTTGATTGCGGATATCGCC [690]

998ano2.4

CTCGTTTACATCTCCGGCGCTGCGAACACTCAGAAGCTCAAAACCCCGGTTACAAAAGACGGCGGTTCCGACCCCTCATG  
GAATTTTCCAATGAAGTTCACCGTCGATGAAGCCGCCGGATTACAGAACCGTCTTACTCTTGTGTTGGAGATTAAACACG  
ACGGGACGTTTGGCGATAAGGACGTTGGACTCGCCCATGTCCCGATCAAAGAGTTGTTAGACGGGTTATCGAAAGACGGG  
GCGTCCGAGAAGCAAGTTAGTTATCAGGTCAGGACCCCCTCCGGAAAGCAGAAAGGGAGTCTGAATTTTTTCGTATAAGTT  
TGGGGAGAAGTTTACTGCAAAGGTGGTGGAGGAGGCGGTTACTGCTTATCCTGCTGCTGCTGGTATGGCTGTTGGTTCAA  
GTTCTGGATACCAACAGCCATATGCTGCTGCGCCTGGTGGGTATTACCCACCAGGTGCTGCTGGCGGATAACCCACCTCAG  
CCACAGCCTGGATATGCGTATCAACAACAACAACCAGGCTATGGTTATCCTCCCCACCACCCCAGGGTACGCTGGGTA  
CCCTCCACAACAACCAGGATATGGGTATCCGCCAGTCCAGCAGCCACAACAGGCTCCAAAGAAGAATGGACTTGGTATGG  
GGTTGGGAGCTGGTTTGCTAGGAGGTGCACTTGGTGGGCTGTTGATTGCGGATATCGCC [699]

998ano2.7

CTCGTTTACATCTCCGGCGCTGCAAACACTCAGAAGCTCAAAACCCCGGTTACAAAAGACGGCGGTTCCGACCCCTCATG  
GAATTTTCCAATGAAGTTCACCGTTGATGAAGCCGCCGGATTACAGAACCGTCTTACTCTTGTGTTGTCGAGATTAAACACG  
ACGGGACGTTTGGCGATAAGGACGTTGGACTCGCCCATGTGCCGATCAAAGAGTTGTTAGACGGATTATCAAAGACGGG  
ACGTCCGAGAAGCAAGTTAGTTATCAGGTCAGGACTCCCTCCGGAAAGCAGAAAGGGAGTCTGAATTTTTTCGTATAAGTT  
TGGGGAGAAGTTTACGGCAAAGGTGGTGGAGGAGGCGGTTACTGCTTATCCTGTT::ACTGGTATGGCTGTTGGTTCAA  
GTTCTGGATACCAACAGCCATATCTGCTGCGCCTGGTGGGTATTACCCACCAGGTGCTGCTGGCGGATAACCCACCTCAG  
CCACAGCCTGGATATGCGTATCAACAACAACAACCAGGCTATGGTTATCCTCCCCACCACCCCAGGGTACGCTGGGTA  
CCCTCCACAACAACCAGGATATGGGTATCCGCCAGTCCAGCAA::CAACAGCCTCCAAAGAAGAATGGACTTGGTATGG  
GGTTGGGAGCTGGTTTGCTAGGCGGTGCACTTGGTGGGCTGTTGATTGCGGATATCGCC [693]

998ano3

CTCGTTTACATCTCCGGCGCTGCAAACACTCAGAAGCTCAAAACCCCGGTTACAAAAGACGGCGGTTCCGACCCCTCATG  
GAATTTTCCAATGAAGTTCACCGTTGATGAAGCCGCCGGATTACAGAACCGTCTTACTCTTGTGTTGTCGAGATTAAACACG  
ACGGGACGTTTGGCGATAAGGACGTTGGACTCGCCCATGTCCCGATCAAAGAGTTGTTAGACGGATTATCGAAAGACGGG  
ACGTCCGATAAGCAAGTTAGTTATCAGGTCAGGACTCCCTCCGGAAAGCAGAAAGGGAGTCTGAATTTTTTCGTATAAGTT  
TGGGGAGAAGTTTACGGCAAAGGTGGTGGAGGAGGCGGTTACTGCTTATCCTGTT::ACTGGTATGGCTGTTGGTTCAA  
GTTCTGGATACCAACAGCCATATGTTGCTGCGCCTGGTGGGTATTACCCACCAGGTGCTAATGGCGGATAACCCACCTCAG  
CCACAGCCTGGATATGCGTATCAACAACAACAACCAGGCTATGGTTATCCTCCCCACCACCCCAGGGTACGCTGGGTA  
CCCTCCA::CAACCAGGATATGGGTATCCGCCAGTCCAACAGCCACAACAGCCTCCAAAGAAGAATGGACTTGGTATGG  
GGTTGGGAGCTGGTTTGCTAGGAGGTGCACTTGGTGGGCTGTTGATTGCGGATATCGCC [693]

998ano04

CTCGTTTACATCTCCGGCGCTGCAAACACTCAGAAGCTCAAAACCCCGGTTACAAAAGACGGTGGTTCCGACCCCTCATG  
GAATTTTCCAATGAAGTTCACCGTTGATGAAGCCGCCGGATTACAGAACCGTCTTACTCTTGTGTTGTCGAGATTAAACACG  
ACGGGACGTTTGGCGATAAGGACGTTGGACTCGCCCATGTCCCGATCAAAGAGTTGTTAGACGGATTATCAAAGACGGG

AAGTCCGAGAAGCAAGTTAGTTATCAGGTCAGGACCCCCTCGGGAAAGCAGAAAGGGAGTCTGACTTTTTTCGTATAAGTT  
TGGGGAGAAGTTTACGGCAAAGGTGGTGGAGGAGGCGGTTACTGCTTATCCTGTT:::ACTGGTATGGCTGTTGGTTCAA  
GTTCTGGATAACCAACAGCCATATGCTGCTGCGCCTGGTGGGTATTACCCACCAGGTGCTGCTGGCGGATAACCCACCTCAG  
CCACAGCCTGGATATGCGTATCAACAACAACAACCAGGCTATGGTTATCCTCCCCACCACCCCAGGGTACGCTGGGTA  
CCCTCCA:::CAACCAGGATATGGGTATCCGCCAGTCCAGCAA:::CAACAGCCTCCAAAGAAGAATGGACTTGGTATGG  
GGTGGGAGCTGGTTTGTCTAGGAGGTGCACTTGGTGGGCTGTTGATTGCGGATATCGCC [690]

998ano04.2

CTCGTTTACATCTCCGGCGCTGCAAACACTCAGAAGCTCAAACCCCAGGTTACAAAGACGGTGGTTCCGACCCCTCATG  
GAATTTTCCAATGAAGTTCACCGTTGATGAAGCCGCCGGATTACAGAACCGTCTTACTCTTGTGTCGAGATTAACACAG  
ACGGGACGTTTGGCGATAAGGACGTTGGACTCGCCCATGTCCCGATCAAAGAGTTGTTAGACGGATTATCAAAGACGGG  
ACGTCCGAGAAGCAAGTTAGTTATCAGGTCAGGACCCCCTCGGGAAAGCAGAAAGGGAGTCTGACTTTTTTCGTATAAGTT  
TGGGGAGAAGTTTACGGCAAAGGTGGTGGAGGAGGCGGTTACTGCTTATCCTGTT:::ACTGGTATGGCTGTTGGTTCAA  
GTTCTGGATAACCAACAGCCATATGCTGCTGCGCCTGGTGGGTATTACCCACCAGGTGCTGCTGGCGGATAACCCACCTCAG  
CCACAGCCTGGATATGCGTATCAACAACAACAACCAGGCTATGGTTATCCTCCCCACCACCCCAGGGTACGCTGGGTA  
CCCTCCA:::CAACCAGGATATGGGTATCCGCCAGTCCAGCAA:::CAACAGCCTCCAAAGAAGAATGGACTTGGTATGG  
GGTGGGAGCTGGTTTGTCTAGGAGGTGCACTTGGTGGGCTGTTGATTGCGGATATCGCC [690]

998ano5.1

CTCGTTTACATCTCCGGCGCTGCAAACACTCAGAAGCTCAAACCCCAGGTTACAAAGACGGCGGTTCCGACCCCTCATG  
GAATTTTCCAATGAAGTTCACCGTTGATGAAGCCGCCGGATTACAGAACCGGCTTACTCTTGTGTCGAGATTAACACAG  
ACGGGACGTTTGGCGATAAGGACGTTGGACTCGCCCATGTCCCGATCAAAGAGTTGTTAGACGGATTATCGAAAGACGGG  
ACGTCTGAGAAGCAAGTTAGTTATCAGGTCAGGACTCCCTCGGGAAAGCAGAAAGGGAGTCTGAATTTTTTCGTATAAGTT  
TGGGGAGAAGTTTACTGCAAAGGTGGTGGAGGAGGCGGTTACTGCTTATCCTGTT:::ACTGGTATGGCTGTTGGTTCAA  
GTTCTGGATAACCAACAGCCATATGCTGCTGCGCCTGGTGGGTATTACCCACCAGGTGCTGCTGGCGGATAACCCACCTCAG  
CCA:::CCTGGATATGCGTATCAACAACAACAACCAGGCTATGGTTATCCTCCCCACCACCCCAGGGTACGCTGGGTA  
CCCTCCA:::CAACCAGGATATGGGTATCCGCCAGTCCAGCAA:::CAACAGCCTCCAAAGAAGAATGGACTTGGTATGG  
GGTGGGAGCTGGTTTGTCTAGGCGGTGCACTTGGTGGGCTGTTGATTGCGGATATCGCC [687]

998ano5.2

CTCGTTTACATCTCCGGCGCTGCAAACACTCAGAAGCTCAAACCCCAGGTTACAAAGACGGCGGTTCCGACCCCTCATG  
GAATTTTCCAATGAAGTTCACCGTTGATGAAGCCGCCGGATTACAGAACCGGCTTACTCTTGTGTCGAGATTAACACAG  
ACGGGACGTTTGGCGATAAGGACGTTGGACTCGCCCATGTGCCGATCAAAGAGTTGTTAGACGGATTATCAAAGACGGG  
ACGTCCGAGAAGCAAGTTAGTTATCAGGTCAGGACTCCCTCGGGAAAGCAGAAAGGGAGTCTGAATTTTTTCGTATAAGTT  
TGGGGAGAAGTTTACTGCAAAGGTGGTGGAGGAGGCGGTTACTGCTTATCCTGTT:::ACTGGTATGGCTGTTGGTTCAA  
GTTCTGGATAACCAACAGCCATATCTGCTGCGCCTGGTGGGTATTACCCACCAGGTGCTGCTGGCGGATAACCCACCTCAG  
CCACAGCCTGGATATGCGTATCAACAACAACAACCAGGCTATGGTTATCCTCCCCACCACCCCAGGGTACGCTGGGTA  
CCCTCCACAACAACCAGGATATGGGTATCCGCCAGTCCAGCAA:::CAACAGCCTCCAAAGAAGAATGGACTTGGTATGG  
GGTGGGAGCTGGTTTGTCTAGGCGGTGCACTTGGTGGGCTGTTGATTGCGGATATCGCC [693]

998ano06

CTCGTTTACATCTCCGGCGCTGCAAACAGTCAAGAAGCTCAAACCCCAGGTTACAAAGACGGTGGTTCCGACCCCTCATG  
GAATTTTCCAATGAAGTTCACCGTTGATGAAGCCGCCGGATTACAGAACCGGCTTACTCTTGTGTTGGAGATTAACACAG  
ACGGGACTTTTGGCGATAAGGACGTTGGACTCGCCCATGTCCCGATCAAAGAGTTGTTAGACGGATTATCGAAAGACGGG  
ACGTCCGAGAAGCAAGTTAGTTATCAGGTCAGGACTCCCTCGGGAAAGCAGAAAGGGAGTCTGAATTTTTTCGTATAAGTT  
TGGGGAGAAGTTTACTGCAAAGGTGGTGGAGGAGGCGGTTACTGCTTATCCTGTT:::ACTGGTATGGCTGTTGGTTCAA  
GTTCTGGATAACCAACAGCCATATGCTGCTGCGCCTGGTGGGTATTACCCACCAGGTGCTGCTGGCGGATAACCCACCTCAG  
CCACAGCCTGGATATGCGTAT:::CAACAACAACCAGGCTATGGTTATCCTCCCCACCACCCCAGGGTACGCTGGGTA  
CCCTCCACAACAACCAGGATATGGGTATCCGCCAGTCCAGCAA:::CAACAGCCTCCAAAGAAGAATGGACTTGGTATGG  
GGTGGGAGCTGGTTTGTCTAGGAGGTGCACTTGGTGGGCTGTTGATTGCGGATATCGCC [690]

998ano7

CTCGTTTACATCTCCGGCGCTGCAAACAGTCAAGAAGCTCAAACCCCAGGTTACAAAGACGGTGGTTCCGACCCCTCATG



GAATTTTCCAATGAAGTTCACCGTTGATGAAGCCGCCGGATTACAGAACCGGCTTACTCTTGTGTGGAGATTAACACG  
ACGGGACTTTTGGCGATAAGGACGTTGGACTCGCCCATGTCCCGATCAAAGAGTTGTTAGACGGATTATCAAAGACGGG  
ACGTCCGAGAAGCAAGTTAGTTATCAGGTCAGGACTCCCTCGGAAAGCAGAAAGGGAGTCTGAATTTTTCGTATAAGTT  
TGGGGAGAAGTTTACGGCAAAGTGGTGGAGGAGGCGGTTACTGCTTATCCTGTT:::ACTGGTATGGCTGTTGGTTCAA  
GTTCTGGATACCAACAGCCATATCTGCTGCGCCTGGTGGGTATTACCCACCAGGTGCTGCTGGCGGATAACCCACCTCAG  
CCACAGCCTGGATATGCGTAT:::CAACAACAACCAGGCTATGGTTATCCTCCCCACCACCCCGGGGTACGCTGGGTA  
CCCTCCACAACAACCAGGATATGGGTATCCGCCAGTCCAGCAA:::CAACAGCCTCCAAAGAAGAATGGACTTGGTATGG  
GGTTGGGAGCTGGTTTGTCTAGGAGGTGCACCTGGTGGGCTGTTGATTGCGGATATCGCC [690]

998ano7.2

CTCGTTTACATCTCCGGCGCTGCAAACACTCAGAAGCTCAAACCCCGGTTACAAAGACGGCGGTTTCGGACCCCTCATG  
GAATTTTCCAATGAAGTTCACCGTTGATGAAGCCGCCGGATTACAGAACCGTCTTACTCTTGTGTGGAGATTAACACG  
ACGGGACTTTTGGCGATAAGGACGTTGGACTCGCCCATGTCCCGATCAAAGAGTTGTTAGACGGATTATCGAAAGACGGG  
ACGTCCGAGAAGCAAGTTAGTTATCAGGTCAGGACTCCCTCGGAAAGCAGAAAGGGAGTCTGAATTTTTCGTATAAGTT  
TGGGGAGAAGTTTACTGCAAAGTGGTGGAGGAGGCGGTTACTGCTTATCCTGTT:::ACTGGTATGGCTGTTGGTTCAA  
GTTCTGGATACCAACAGCCATATGCTGCTGCGCCTGGTGGGTATTACCCACCAGGTGCTGCTGGCGGATAACCCACCTCAG  
CCACAGCCTGGATATGCGTAT:::CAACAACAACCAGGCTATGGTTATCCTCCCCACCACCCCGGGGTACGCTGGGTA  
CCCTCCACAACAACCAGGATATGGGTATCCGCCAGTCCAGCAA:::CAACAGCCTCCAAAGAAGAATGGACTTGGTATGG  
GGTTGGGAGCTGGTTTGTCTAGGAGGTGCACCTGGTGGGCTGTTGATTGCGGATATCGCC [690]

998ano8.1

CTCGTTTACATCTCCGGCGCTGCAAACACTCAGAAGCTCAAACCCCGGTTACAAAGACGGCGGTTTCGGACCCCTCATG  
GAATTTTCCAATGAAGTTCACCGTTGATGAAGCCGCCGGATTACAGAACCGTCTTACTCTTGTGTGGAGATTAACACG  
ACGGGACTTTTGGCGATAAGGACGTTGGACTCGCCCATGTGCCGATCAAAGAGTTGTTAGACGGATTATCAAAGACGGG  
ACGTCCGAGAAGCAAGTTAGTTATCAGGTCAGGACTCCCTCGGAAAGCAGAAAGGGAGTCTGAATTTTTCGTATAAGTT  
TGGGGAGAAGTTTACTGCAAAGTGGTGGAGGAGGCGGTTACTGCTTATCCTGTT:::ACTGGTATGGCTGTTGGTTCAA  
GTTCTGGATACCAACAGCCATATGCTGCTGCGCCTGGTGGGTATTACCCACCAGGTGCTGCTGGCGGATAACCCACCTCAG  
CCACAGCCTGGATATGCGTATCAACAACAACAACCAGGCTATGGTTATCCTCCCCACCACCCCGGGGTACGCTGGGTA  
CCCTCCACAACAACCAGGATATGGGTATCCGCCAGTCCAGCAA:::CAACAGCCTCCAAAGAAGAATGGACTTGGTATGG  
GGTTGGGAGCTGGTTTGTCTAGGCGGTGCACCTGGTGGGCTGTTGATTGCGGATATCGCC [693]

998ano8.6

CTCGTTTACATCTCCGGCGCTGCGAACACTCAGAAGCTCAAACCCCGGTTACAAAGACGGCGGTTTCGGACCCCTCATG  
GAATTTTCCAATGAAGTTCACCGTCGATGAAGCCGCCGGATTACAGAACCGTCTTACTCTTGTGTGGAGATTAACACG  
ACGGGACTTTTGGCGATAAGGACGTTGGACTCGCCCATGTCCCGATCAAAGAGTTGTTAGACGGGTTATCGAAAGACGGG  
GCGTCCGAGAAGCAAGTTAGTTATCAGGTCAGGACTCCCTCGGAAAGCAGAAAGGGAGTCTGAATTTTTCGTATAAGTT  
TGGGGAGAAGTTTACTGCAAAGTGGTGGAGGAGGCGGTTACTGCTTATCCTGTT:::GCTGGTATGGCTGTTGGTTCAA  
GTTCTGGATACCAACAGCCATATGCTGCTGCGCCTGGTGGGTATTACCCACCAGGTGCTGCTGGCGGATAACCCACCTCAG  
CCACAGCCTGGATATGCGTATCAACAACAACAACCAGGCTATGGTTATCCTCCCCACCACCCCGGGGTACGCTGGGTA  
CCCTCCACAACAACCAGGATATGGGTATCCGCCAGTCCAGCAGCCACAACAGGCTCCAAAGAAGAATGGACTTGGTATGG  
GGTTGGGAGCTGGTTTGTCTAGGAGGTGCACCTGGTGGGCTGTTGATTGCGGATATTGCC [696]

998ano9

CTCGTTTACATCTCCGGCGCTGCAAACAGTCAAGAAGCTCAAACCCCGGTTACAAAGACGGTGGTTCCGACCCCTCATG  
GAATTTTCCAATGAAGTTCACCGTTGATGAAGCCGCCGGATTACAGAACCGTCTTACTCTTGTGTGGAGATTAACACG  
ATGGGGCGTTTGGCGATAAGGACGTTGGACTCGCCCATGTGCCGATCAAAGAGTTGTTAGACGGATTATCGAAAGACGGG  
ACATCCGATAAGCAAGTTAGTTATCAGGTCAGGACTCCCTCGGAAAGCAGAAAGGGAGTCTGACTTTTTCGTATAAGTT  
TGGGGAGAAGTTTACTGCAAAGTGGTGGAGGAGGCGGTTACTGCTTATCCTGTT:::ACTGGTATGGCTGTTGGTTCAA  
GTTCTGGATACCAACAGCCATATGCTGCTGCGCCTGGTGGGTATTACCCACCAGGTGCTGCTGGCGGATAACCCACCTCAG  
CCACAGCCTGGATATGCGTATCAACAACAACAACCAGGCTATGGTTATCCTCCCCACCACCCCGGGGTACGCTGGGTA  
CCCTCCA:::CAACCAGGATATGGGTATCCGCCAGTCCAGCAA:::CAA:::CCTCCAAAGAAGAATGGACTTGGTATGG  
GGTTGGGAGCTGGTTTGTCTAGGCGGTGCACCTGGTGGGCTGTTGATTGCGGATATCGCC [687]

998ano09.2

CTCGTTTACATCTCCGGCGCTGCAAACAGTCAGAAGCTCAAAACCCCGGTTACAAAAGACGGTGGTTCCGACCCCTCATG  
GAATTTTCCAATGAAGTTCACCGTTGATGAAGCCGCCGGATTACAGAACCGTCTTACTCTTGTGTTGTCGAGATTAAACACG  
ACGGGACGTTTGGCGATAAGGACGTTGGACTCGCCCATGTCCCGATCAAAGAGTTGTTAGACGGATTATCGAAAGACGGG  
ACGTCCGAGAAGCAAGTTAGTTATCAGGTCAGGACTCCCTCGGGAAAGCAGAAAGGGAGTCTGAATTTTTCGTATAAGTT  
TGGGGAGAAGTTTACTGCAAAGGTGGTGGAGGAGGCGGTTACTGCTTATCCTGTT:::ACTGGTATGGCTGTTGGTTCAA  
GTTCTGGATACCAACAGCCATATGCTGCTGCGCCTGGTGGGTATTACCCACCAGGTGCTGCTGGCGGATAACCCACCTCAG  
CCACAGCCTGGATATGCGTATCAACAACAACAACCAGGCTATGGTTATCCTCCCCACCACCCCCAGGGTACGCTGGGTA  
CCCTCCA:::CAACCAGGATATGGGTATCCGCCAGTCCAGCAA:::CAA:::CCTCCAAGAAGAATGGACTTGGTATGG  
GGTTGGGAGCTGGTTTGTAGGCGGTGCACTTGGTGGGCTGTTGATTGCGGATATCGCC [687]

998ano10

CTCGTTTACATCTCCGGCGCTGCGAACAGTCAGAAGCTCAAAACCCCGGTTACAAAAGACGGTGGTTCCGACCCCTCATG  
GAATTTTCCAATGAAGTTCACCGTTGATGAAGCCGCCGGATTACAGAACCGTCTTACTCTTGTGTTGTTGAGATTAAACACG  
ACGGGACGTTTGGCGATAAGGACGTTGGACTCGCCCATGTCCCGATCAAAGAGTTGTTAGACGGATTATCGAAAGACGGG  
ACGTCCGAGAAGCAAGTTAGTTATCAGGTCAGGACTCCCTCCGGAAAACAGAAAGGGAGTCTGAATTTTTCGTATAAATT  
TGGGGAGAAGTTTACTGCAAAGGTGGTGGAGGAGGCGGTTACTGCTTATCCTGTT:::ACTGGTATGGCTGTTGGTTCAA  
GTTCTGGATACCAACAGCCATATGTTGCTGCGCCTGGTGGGTATTACCCACCAGGTGCTGCTGGCGGATAACCCACCTCAG  
CCACAGCCTGGATATGCGTATCAACAACAACAACCAGGCTATGGTTATCCTCCCCACCACCCCCAGGGTACGCTGGGTA  
CCCTCCA:::CAACCAGGATATGGGTATCCGCCAGTCCAGCAGCCACAACAGCCTCCAAGAAGAATGGACTTGGTATGG  
GGTTGGGAGCTGGTTTGTAGGCGGTGCACTTGGTGGGCTGTTGATTGCGGATATCGCC [693]

998ano11

CTCGTTTACATCTCCGGCGCTGCAAACAGTCAGAAGCTCAAAACCCCGGTTACAAAAGACGGTGGTTCCGACCCCTCATG  
GAATTTTCCAATGAAGTTCACCGTTGATGAAGCCGCCGGATTACAGAACCGGCTTACTCTTGTGTTGTCGAGATTAAACACG  
ACGGGACGTTTGGCGATAAGGACGTTGGACTCGCCCATGTCCCGATCAAAGAGTTGTTAGACGGATTATCGAAAGACGGG  
ACGTCCGATAAGCAAGTTAGTTATCAGGTCAGGACCCCTCGGGAAAGCAGAAAGGGAGTCTGACTTTTTTCGTATAAATT  
TGGGGAGAAGTTTACGGCAAAGGTGGTGGAGGAGGCGGTTACTGCTTATCCTGTT:::ACTGGTATGGCTGTTGGTTCAA  
GTTCTGGATACCAACAGCCATATGCTGCTGCGCCTGGTGGGTATTACCCACCAGGTGCTGCTGGCGGATAACCCACCTCAG  
CCACAGCCTGGATATGCGTAT:::CAACAACAACCAGGCTATGGTTATCCTCCCCACCACCCCCGGGGTACGCTGGGTA  
CCCTCCACAACAACCAGGATATGGGTATCCGCCAGTCCAGCAA:::CAACAGCCTCCAAGAAGAATGGACTTGGTATGG  
GGTTGGGAGCTGGTTTGTAGGCGGTGCGCTTGGTGGGCTGTTGATTGCGGATATCGCC [690]

998ano11.2

CTCGTTTACATCTCCGGCGCTGCAAACACTCAGAAGCTCAAAACCCCGGTTACAAAAGACGGTGGTTCCGACCCCTCATG  
GAATTTTCCAATGAAGTTCACCGTTGATGAAGCCGCCGGATTACAGAACCGTCTTACTCTTGTGTTGTCGAGATTAAACACG  
ACGGGACGTTTGGCGATAAGGACGTTGGACTCGCCCATGTCCCGATCAAAGAGTTGTTAGACGGATTATCGAAAGACGGG  
ACGTCCGATAAGCAAGTTAGTTATCAGGTCAGGACTCCCTCGGGAAAGCAGAAAGGGAGTCTGAATTTTTCGTATAAATT  
TGGGGAGAAGTTTACTGCAAAGGTGGTGGAGGAGGCGGTTACTGCTTATCCTGTT:::ACTGGTATGGCTGTTGGTTCAA  
GTTCTGGATACCAACAGCCATATGCTGCTGCGCCTGGTGGGTATTACCCACCAGGTGCTGCTGGCGGATAACCCACCTCAG  
CCACAGCCTGGATATGCGTAT:::CAACAACAACCAGGCTATGGTTATCCTCCCCACCACCCCCAGGGTACGCTGGGTA  
CCCTCCACAACAACCAGGATATGGGTATCCGCCAGTCCAGCAA:::CAACAGCCTCCAAGAAGAATGGACTTGGTATGG  
GGTTGGGAGCTGGTTTGTAGGCGGTGCGCTTGGTGGGCTGTTGATTGCGGATATCGCC [690]

998ano12.4

CTCGTTTACATCTCCGGCGCTGCGAACAGTCAGAAGCTCAAAACCCCGGTTACAAAAGACGGTGGTTCCGACCCCTCATG  
GAATTTTCCAATGAAGTTCACCGTTGATGAAGCCGCCGGATTACAGAACCGTCTTACTCTTGTGTTGTTAGAGATTAAACACG  
ATGGGACATTTGGCGATAAGGACGTTGGACTCGCCCATGTCCCGATCAAAGAGTTGTTAGATGGATTATCGAAAGACGGG  
ACATCCGAGAAGCAAGTTAGTTATCAGGTCAGGACTCCCTCGGGAAAGCAGAAAGGGAGTCTGAATTTTTCGTATAAATT  
TGGGGAGAAGTTTACTGCAAAGGTGGTGGAGGAGGCGGTTACTGCTTATCCTGTT:::ACTGGTATGGCTGTTGGTTCAA  
GTTCTGGATACCAACAGCCATACGCTGCTGCGCCTGGTGGGTATTACCCACCAGGTGCTGCTGGCGGATAACCCACCTCAG  
CCACAGCCTGGATATGCGTATCAACAACAACAACCAGGCTATGGTTATCCTCCCCACCACCCCCAGGGTACGCTGGGTA

CCCTCCA:::CAACCAGGATATGGGTATCCGCCAGTCCAGCAA:::CAA:::CCTCCAAAGAAGAATGGACTTGGTATGG  
GGTTGGGAGCTGGTTTGTCTAGGCGGTGCACCTTGGTGGGCTGTTGATTGCGGATATCGCC [ 687 ]

998ano12.2

CTCGTTTACATCTCCGGCGCTGCGAACACTCAGAAGCTCAAAACCCCGGTTACAAAGACGGCGGTTTCGGACCCCTCATG  
GAATTTCCAATGAAGTTCACCGTCGATGAAGCCGCCGGATTACAGAACCGTCTTACTCTTGTGTGGAGATTAACACG  
ACGGGACGTTTGGCGATAAGGACGTTGGACTCGCCCATGTCCCGATCAAAGAGTTGTTAGACGGGTTATCGAAAGACGGG  
GCGTCCGAGAAGCAAGTTAGTTATCAGGTCAGGACTCCCTCGGGAAGCAGAAAGGGAGTCTGAATTTTTTCGTATAAGTT  
TGGGGAGAAGTTTACTGCAAAGGTGGTGGAGGAGGCGGTTACTGCTTATCCTGTT:::GCTGGTATGGCTGTTGGTTCAA  
GTTCTGGATACCAACAGCCATATGCTGCTGCGCCTGGTGGGTATTACCCACCAGGTGCTGCTGGCGGATAACCCACCTCAG  
CCACAGCCTGGATATGCGTATCAACAACAACAACCAGGCTATGGTTATCCTCCCCACCACCCCCAGGGTACGCTGGGTA  
CCCTCCACAACAACCAGGATATGGGTATCCGCCAGTCCAGCAGCCACAACAGGCTCCAAAGAAGAATGGACTTGGTATGG  
GGTTGGGAGCTGGTTTGTCTAGGAGGTGCACCTTGGTGGGCTGTTGATTGCGGATATTGCC [ 696 ]

998pet01

CTCGTTTACATCTCCGGCGCTGCGAACACTCAGAAGCTCAAAACCCCGGTTACAAAGACGGCGGTTTCGGACCCCTCATG  
GAATTTCCAATGAAGTTCACCGTCGATGAAGCCGCCGGATTACAGAACCGTCTTACTCTTGTGCTGGAGATTAACACG  
ACGGGACGTTTGGCGATAAGGACGTTGGACTCGCCCATGTCCCGATCAAAGAGTTGTTAGACGGGTTATCGAAAGACGGG  
ACGTCGAGAAGCAAGTTAGTTATCAGGTCAGGACTCCCTCGGGAAGCAGAAAGGGAGTCTGAATTTTTTCGTATAAGTT  
TGGGGAGAAGTTTACTGCAAAGGTGGTGGAGGAGGCGGTTACTGCTTATCCTGTT:::GCTGGTATGGCTGTTGGTTCAA  
GTTCTGGATACCAACAGCCATATGTTGCTGCGCCTGGTGGGTATTACCCACCAGGTGCTGCTGGCGGATAACCCACTTCAA  
CCACAGCCTGGATATGCGTAT:::CAACACCAACCAGGCTATGGTTATCCTCCCCACCACCCCCAGGGTACGCCGGGTA  
CCCTCCACAACAACCAGGATATGGGTATCCGCCAGTCCAGCAGCCACAACAAAAGCCGAAGAAGAATGGACTTGGTATGG  
GGTTGGGAGCTGGTTTGTCTAGGAGGTGCACCTTGGTGGGCTGTTGATTGCGGATATCGCC [ 693 ]

998pet01.2

CTCGTTTACATCTCCGGCGCTGCGAACACTCAGAAGCTCAAAACCCCGGTTACAAAGACGGCGGTTTCGGACCCCTCATG  
GAATTTCCAATGAAGTTCACCGTCGATGAAGCCGCCGGATTACAGAACCGTCTTACTCTTGTGCTGGAGATTAACACG  
ACGGGACGTTTGGCGATAAGGACGTTGGACTCGCCCATGTCCCGATCAAAGAGTTGTTGGACGGGTTATCGAAAGACGGG  
ACGTCGAGAAGCAAGTTAGTTATCAGGTCAGGACTCCCTCGGGAAGCAGAAAGGGAGTCTGAATTTTTTCGTATAAGTT  
TGGGGAGAAGTTTACTGCAAAGGTGGTGGAGGAGGCGGTTACTGCTTATCCTGTT:::GCTGGTATGGCTGTTGGTTCAA  
GTTCTGGATACCAACAGCCATATGCTGCTGCGCCTGGTGGGTATTACCCACCAGGTGCTGCTGGCGGATAACCCACCTCAA  
CCACAGCCTGGATATGCGTAT:::CAACAACAACCAGGCTATGGTTATCCTCCCCACCACCCCCAGGGTACGCTGGGTA  
CCCTCCACAACAACCAGGATATGGGTATCCGCCAGTCCAGCAGCCACAACAGCCTCCAAAGAAGAATGGACTTGGTATGG  
GGTTGGGAGCTGGTTTGTCTAGGAGGTGCACCTTGGTGGGCTGTTGATTGCGGATATCGCC [ 693 ]

998pet02

CTCGTTTACATCTCCGGCGCTGCGAACACTCAGAAGCTCAAAACCCCGGTTACAAAGACGGCGGTTTCGGACCCCTCATG  
GAATTTCCAATGAAGTTCACCGTTGATGAAGCCGCCGGATTACAGAACCGTCTTACTCTTGTGTGGAGATTAACACG  
ACGGGACGTTTGGCGATAAGGACGTTGGACTCGCCCATGTCCCGATCAAAGAGTTGTTAGACGGATTATCGAAAGACGGG  
ACGTCGAGAAGCAAGTTAGTTATCAGGTTAGGACTCCCTCTGGAAGCAGAAAGGGAGTCTGAATTTTTTCGTATAAGTT  
TGGGGAGAAGTTTACTGCAAAGGTGGTGGAGGAGGCGGTTACTGCTTATCCTGTT:::GCTGGTATGGCTGTTGGTTCAA  
GTTCTGGATACCAACAGCCATATGCTGCTGCGCCTGGTGGGTATTACCCACCAGGTGCTGCTGGCGGATAACCCACCTCAG  
CCACAGCCTGGATATGCGTAT:::CAACAACAACCAGGCTATGGTTATCCTCCCCACCACCCCCAGGGTACGCTGGGTA  
CCCTCCACAACAACCAGGATATGGGTATCCGCCAGTCCAGCAGCCACAACAAAAGCCAAAGAAGAATGGACTTGGTATGG  
GGTTGGGAGCTGGTTTGTCTAGGAGGTGCACCTTGGTGGGCTGTTGATTGCGGATATCGCC [ 690 ]

998pet03

CTCGTTTACATCTCCGGCGCTGCGAACACTCAGAAGCTCAAAACGCCGGTTACAAAGATGGCGGTTTCGGACCCCTCATG  
GAATTTCCAATGAAGTTCACCGTTGATGAAGCCGCCGGATTACAGAACCGTCTTACTCTTGTGTGGAGATTAACACG  
ACGGGACGTTTGGCGATAAGGACGTTGGACTCGCCCATGTGCCGATCAAAGAGTTGTTGGACGGATTATCGAAAGACGGG  
ACGTCGAGAAGCAAGTTAGTTATCAGGTTAGGACTCCCTCTGGAAGCAGAAAGGGAGTCTGAATTTTTTCGTATAAGTT  
TGGGGAGAAGTTTACTGCAAAGGTGGTGGAGGAGGCGGTTACTGCTTATCCTGTT:::TCTGGTATGGCTGTTGGTTCAA

GTTCTGGATACCAACAGCCATATCCTGCTGCGCCTGGTGGGTATTACCCACCAGGTGCTGCTGGCGGATAACCCACCTCAG  
CCACAGCCTGGATATGCGTAT::CAACAACAACCAGGCTATGGTTATCCTCCCCACCACCCCAGGGTACGCTGGGTA  
CCCTCCACAACAACCAGGATATGGGTATCCGCCAGTCCAGCAGCCACAACAGCCTCCAAAGAAGAATGGACTGGGTATGG  
GGTTGGGAGCTGGTTTGCTAGGAGGTGCACTCGGTGGGCTGTTGATTGCGGATATCGCC [693]

998pet03.2

CTCGTTTACATCTCCGGCGCTGCGAACACTCAGAAGCTCAAAACCCCGGTTACAAAGACGGCGGTTTCGGACCCCTCATG  
GAATTTTCCAATGAAGTTCACCGTTGATGAAGCCGCCGGATTACAGAACCGTCTTACTCTTGTGTTGGAGATTAAACACG  
ACGGGACGTTTGGCGATAAGGACGTTGGACTCGCCCATGTCCCGATCAAAGAGTTGTTGGACGGATTATCGAAAGACGGG  
ACGTCCGAGAAGCAAGTTAGTTATCAGGTCAGGACTCCCTCTGGAAAGCAGAAAGGGAGTCTGAATTTTTCGTATAAGTT  
TGGGGAGAAGTTTACTGCAAAGGTGGTGGAGGAGGCGGTTACTGCTTATCCTGTT::GCTGGTATGGCTGTTGGTTCAA  
GTTCTGGATACCAACAGCCATATGCTGCTGCGCCTGGTGGGTATTACCCACCAGGTGCTGCTGGCGGATAACCCACCTCAA  
CCACAGCCTGGATATGCGTAT::CAACAACAACCAGGCTATGGTTATCCTCCCCACCACCCCAGGGTACGCTGGGTA  
CCCTCCACAACAACCAGGATATGGGTATCCGCCAGTCCAGCAGCCACAACAGCCTCCAAAGAAGAATGGACTGGGTATGG  
GGTTGGGAGCTGGTTTGCTAGGAGGTGCACTTGGTGGGCTGTTGATTGCGGATATCGCC [693]

998pet04

CTCGTTTACATCTCCGGCGCTGCGAACACTCAGAAGCTCAAAACCCCGGTTACAAAGACGGCGGTTTCGGACCCCTCATG  
GAATTTTCCAATGAAGTTCACCGTTGATGAAGCCGCCGGATTACAGAACCGTCTTACTCTTGTGTTGGAGATTAAACACG  
ACGGGACGTTTGGCGATAAGGACGTTGGACTCGCCCATGTCCCGATCAAAGAGTTGTTGGACGGGTTATCGAAAGACGGG  
ACGTCCGAGAAGCAAGTTAGTTATCAGGTTAGGACTCCCTCTGGAAAGCAGAAAGGGAGTCTGAATTTTTCGTATAAGTT  
TGGGGAGAAGTTTACTGCAAAGGTGGTGGAGGAGGCGGTTACTGCTTATCCTGTT::GCTGGTATGGCTGTTGGTTCAA  
GTTCTGGATACCAACAGCCATATCCTGCTGCGCCTGGTGGGTATTACCCACCAGGTGCTGCTGGCGGATAACCCACCTCAG  
CCACAGCCTGGATATGCGTAT::CAACAACAACCAGGCTATGGTTATCCTCCCCACCACCCCAGGGTACGCTGGGTA  
CCCTCCACAACAACCAGGATATGGGTATCCGCCAGTCCAGCAGCCACAACAGCCTCCAAAGAAGAATGGACTTGGTATGG  
GGTTGGGAGCTGGTTTGCTAGGAGGTGCACTCGGTGGGCTGTTGATTGCGGATATCGCC [693]

998pet04.2

CTCGTTTACATCTCCGGCGCTGCGAACACTCAGAAGCTCAAAACCCCGGTTACAAAGACGGCGGTTTCGGACCCCTCATG  
GAATTTTCCAATGAAGTTCACCGTTGATGAAGCCGCCGGATTACAGAACCGTCTTACTCTTGTGTTGGAGATTAAACACG  
ACGGGACGTTTGGCGATAAGGACGTTGGACTCGCCCATGTCCCGATCAAAGAGTTGTTAGACGGATTATCGAAAGACGGG  
ACGTCCGAGAAGCAAGTTAGTTATCAGGTCAGGACTCCCTCTGGAAAGCAGAAAGGGAGTCTGAATTTTTCGTATAAGTT  
TGGGGAGAAGTTTACTGCAAAGGTGGTGGAGGAGGCGGTTACTGCTTATCCTGTT::GCTGGTATGGCTGTTGGTTCAA  
GTTCTGGATACCAACAGCCATATGCTGCTGCGCCTGGTGGGTATTACCCACCAGGTGCTGCTGGCGGATAACCCACCTCAA  
CCACAGCCTGGATATGCGTAT::CAACAACAACCAGGCTATGGTTATCCTCCCCACCACCCCAGGGTACGCTGGGTA  
CCCTCCACAACAACCAGGATATGGGTATCCGCCAGTCCAGCAGCCACAACAGCCTCCAAAGAAGAATGGACTTGGTATGG  
GGTTGGGAGCTGGTTTGCTAGGAGGTGCACTCGGTGGGCTGTTGATTGCGGATATCGCC [693]

998pet05

CTCGTTTACATCTCCGGCGCTGCGAACACTCAGAAGCTCAAAACCCCGGTTACAAAGACGGCGGTTTCGGACCCCTCATG  
GAATTTTCCAATGAAGTTCACCGTCGATGAAGCCGCCGGATTACAGAACCGTCTTACTCTTGTGCTGGAGATTAAACACG  
ACGGGACGTTTGGCGATAAGGACGTTGGACTCGCCCATGTCCCGATCAAAGAGTTGTTGGACGGGTTATCGAAAGACGGG  
ACGTCCGAGAAGCAAGTTAGTTATCAGGTCAGGACTCCCTCGGAAAACAGAGAGGGAGTCTGAATTTTTCGTATAAGTT  
TGGGGAGAAGTTTACTGCAAAGGTGGTGGAGGAGGCGGTTACTGCTTATCCTGTT::GCTGGTATGGCTGTTGGTTCAA  
GTTCTGAATACCAACAGCCATATGTTGCTGCGCCTGATGGGTATTACCCACCAGGTGCTGCTGGCGGATAACCCACCTCAG  
CCACAGCCTGGATATGCGTAT::CAACAGCAACCAGGCTATGGTTATCCTCCCCACCACCCCAGGGTACGCTGGATA  
CCCTCCACAACAACCAGGATATGGGTATCCGCCAGTCCAGCAGCCACAACAGCCTCCAAAAAAGAATGGACTTGGTATGG  
GGTTGGGAGCTGGTTTGCTAGGAGGTGCACTTGGTGGGCTGTTGATTGCGGATATCGCC [693]

998pet05.2

CTCGTTTACATCTCCGGCGCTGCGAACACTCAGAAGCTCAAAACCCCGGTTACAAAGACGGCGGTTTCGGACCCCTCATG  
GAATTTTCCAATGAAGTTCACCGTCGATGAAGCCGCCGGATTACAGAACCGTCTTACTCTTGTGCTGGAGATTAAACACG  
ACGGGACGTTTGGCGATAAGGACGTTGGACTCGCCCATGTCCCGATCAAAGAGTTGTTGGACGGGTTATCGAAAGACGGG

ACGTCCGAGAAGCAAGTTAGTTATCAGGTCAGGACTCCCTCTGGAAAGCAGAAAGGGAGTCTGAATTTTTTCGTATAAGTT  
TGGGGAGAAGTTTACTGCAAAGGTGGTGGAGGAGGCGGTTACTGCTTATCCTGTT::GCTGGTATGGCTGTTGGTTCAA  
GTTCTGGATAACCAACAGCCATATGTTGCTGCGCCTGGTGGGTATTACCCACCAGGTGCTGCTGGCGGATAACCCACCTCAA  
CCACAGCCTGGATATGCGTAT::CAACAACAACCAGGCTATGGTTATCCTCCCCACCACCCCCAGGGTACGCTGGGTA  
CCCTCCACAACAACCAGGATATGGGTATCCGCCAGTCCAGCAGCCACAACAAAAGCCAAAGAAGAATGGACTTGGTATGG  
GGTTGGGAGCTGGTTTGTCTAGGAGGTGCACTTGGTGGGCTGTTGATTGCGGATATCGCC [693]

998pet06

CTCGTTTACATCTCCGGCGCTGCGAACACTCAGAAGCTCAAACCCCGGTTACAAAAGACGGCGGTTTCGGACCCCTCATG  
GAATTTTCCAATGAAGTTCACCGTCGATGAAGCCGCCGGATTACAGAACCGTCTTACTCTTGTGCTGGAGATTAACACAG  
ACGGGACGTTTGGCGATAAGGACGTTGGACTCGCCCATGTCCCGATCAAAGAGTTGTTAGACGGGTTATCGAAAGACGGG  
ACGTCCGAGAAGCAAGTTAGTTATCAGGTCAGGACTCCCTCGGGAAAACAGAAAGGGAGTCTGAATTTTTTCGTATAAGTT  
TGGGGAGAAGTTTACTGCAAAGGTGGTGGAGGAGGCGGTTACTGCTTATCCTGTT::GCTGGTATGGCTGTTGGTTCAA  
GTTCTGAATACCAACAGCCATATGTTGCTGCGCCTGATGGGTATTACCCACCAGGTGCTGCTGGCGGATAACCCACTTCAA  
CCACAGCCTGGATATGCGTAT::CAACAGCAACCAGGCTATGGTTATCCTCCCCACCACCCCCAGGGTACGCCGGATA  
CCCTCCACAACAACCAGGATATGGGTATCCGCCAGTCCAGCAGCCACAACAGCCTCCGAAAAGAAGAATGGACTTGGTATGG  
GGTTGGGAGCTGGTTTGTCTAGGAGGTGCACTTGGTGGGCTGTTGATTGCGGATATCGCC [693]

998pet06.2

CTCGTTTACATCTCCGGCGCTGCGAACACTCAGAAGCTCAAACCCCGGTTACAAAAGACGGCGGTTTCGGACCCCTCATG  
GAATTTTCCAATGAAGTTCACCGTCGATGAAGCCGCCGGATTACAGAACCGTCTTACTCTTGTGCTGGAGATTAACACAG  
ACGGGACGTTTGGCGATAAGGACGTTGGACTCGCCCATGTCCCGATCAAAGAGTTGTTGGACGGGTTATCGAAAGACGGG  
ACGTCCGAGAAGCAAGTTAGTTATCAGGTCAGGACTCCCTCGGGAAAAGCAGAAAGGGAGTCTGAATTTTTTCGTATAAGTT  
TGGGGAGAAGTTTACTGCAAAGGTGGTGGAGGAGGCGGTTACTGCTTATCCTGTT::GCTGGTATGGCTGTTGGTTCAA  
GTTCTGGATAACCAACAGCCATATGCTGCTGCGCCTGGTGGGTATTACCCACCAGGTGCTGCTGGCGGATAACCCACCTCAA  
CCACAGCCTGGATATGCGTAT::CAACAACAACCAGGCTATGGTTATCCTCCCCACCACCCCCAGGGTACGCTGGGTA  
CCCTCCACAACAACCAGGATATGGGTATCCGCCAGTCCAGCAGCCACAACAGCCTCCGAAAAGAAGAATGGACTTGGTATGG  
GGTTGGGAGCTGGTTTGTCTAGGAGGTGCACTTGGTGGGCTGTTGATTGCGGATATCGCC [693]

998pet07.2

CTCGTTTACATCTCCGGCGCTGCGAACACTCAGAAGCTCAAACCCCGGTTACAAAAGACGGCGGTTTCGGACCCCTCATG  
GAATTTTCCAATGAAGTTCACCGTTGATGAAGCCGCCGGATTACAGAACCGTCTTACTCTTGTGTTGTGGAGATTAACACAG  
ACGGGACGTTTGGCGATAAGGACGTTGGACTCGCCCATGTCCCGATCAAAGAGTTGTTAGACGGATTATCGAAAGACGGG  
ACGTCCGAGAAGCAAGTTAGTTATCAGGTTAGGACTCCCTCTGGAAAGCAGAAAGGGAGTCTGAATTTTTTCGTATAAGTT  
TGGGGAGAAGTTTACTGCAAAGGTGGTGGAGGAGGCGGTTACTGCTTATCCTGTT::GCTGGTATGGCTGTTGGTTCAA  
GTTCTGGATAACCAACAGCCATATGCTGCTGCGCCTGGTGGGTATTACCCACCAGGTGCTGCTGGCGGATAACCCACCTCAG  
CCACAGCCTGGATATGCGTAT:::CAACAACCAGGCTATGGTTATCCTCCCCACCACCCCCAGGGTACGCTGGGTA  
CCCTCCACAACAACCAGGATATGGGTATCCGCCAGTCCAGCAGCCACAACAAAAGCCAAAGAAGAATGGACTTGGTATGG  
GGTTGGGAGCTGGTTTGTCTAGGAGGTGCACTTGGTGGGCTGTTGATTGCGGATATCGCC [690]

998pet08

CTCGTTTACATCTCCGGCGCTGCGAACACTCAGAAGCTCAAACCCCGGTTACAAAAGACGGCGGTTTCGGACCCCTCATG  
GAATTTTCCAATGAAGTTCACCGTTGATGAAGCCGCCGGATTACAGAACCGTCTTACTCTTGTGTTGTGGAGATTAACACAG  
ACGGGACGTTTGGCGATAAGGACGTTGGACTCGCCCATGTGCCGATCAAAGAGTTGTTAGACGGATTATCGAAAGACGGG  
ACGTCCGAGAAGCAAGTTAGTTATCAGGTTAGGACTCCCTCTGGAAAGCAGAAAGGGAGTCTGAATTTTTTCGTATAAGTT  
TGGGGAGAAGTTTACTGCAAAGGTGGTGGAGGAGGCGGTTACTGCTTATCCTGTT::GCTGGTATGGCTGTTGGTTCAA  
GTTCTGGATAACCAACAGCCATATGCTGCTGCGCCTGGTGGGTATTACCCACCAGGTGCTGCTGGCGGATAACCCACCTCAA  
CCACAGCCTGGATATGCGTAT::CAACAACAACCAGGCTATGGTTATCCTCCCCACCACCCCCAGGGTACGCTGGGTA  
CCCTCCACAACAACCAGGATATGGGTATCCGCCAGTCCAGCAGCCACAACAAAAGCCAAAGAAGAATGGACTTGGTATGG  
GGTTGGGAGCTGGTTTGTCTAGGAGGTGCACTTGGTGGGCTGTTGATTGCGGATATCGCC [693]

998pet08.2

CTCGTTTACATCTCCGGCGCTGCGAACACTCAGAAGCTCAAACCCCGGTTACAAAAGACGGCGGTTTCGGACCCCTCATG

GAATTTTCCAATGAAGTTCACCGTTGATGAAGCCGCCGGATTACAGAACCGTCTTACTCTTGTGTGGAGATTAACACG  
ACGGGACGTTTGGCGATAAGGACGTTGGACTCGCCCATGTCCCGATCAAAGAGTTGTTAGACGGATTATCGAAAGACGGG  
ACGTCCGAGAAGCAAGTTAGTTATCAGGTTAGGACTCCCTCTGGAAAGCAGAAAGGGAGTCTGAATTTTTCGTATAAGTT  
TGGGGAGAAGTTTACTGCAAAGGTGGTGGAGGAGGCGGTTACTGCTTATCCTGTT:::GCTGGTATGGCTGTTGGTTCAA  
GTTCTGGATACCAACAGCCATATGCTGCTGCGCCTGGTGGGTATTACCCACCAGGTGCTGCTGGCGGATACCCACCTCAA  
CCACAGCCTGGATATGCGTAT:::CAACAACAACCAGGCTATGGTTATCCTCCCCACCACCCCAGGGTACGCTGGGTA  
CCCTCCACAACAACCAGGATATGGGTATCCGCCAGTCCAGCAGCCACAACAAAAGCCAAAGAAGAATGGACTTGGTATGG  
GGTTGGGAGCTGGTTTGTCTAGGAGGTGCACCTGGTGGGCTGTTGATTGCGGATATCGCC [693]

998pet11.7

CTCGTTTACATCTCCGGCGCTGCGAACACTCAGAAGCTCAAACGCCGGTTCACAAAGATGGCGGTTTCGGACCCCTCATG  
GAATTTTCCAATGAAGTTCACCGTTGATGAAGCCGCCGGATTACAGAACCGTCTTACTCTTGTGTGGAGATTAACACG  
ACGGGACGTTTGGCGATAAGGACGTTGGACTCGCCCATGTCCCGATCAAAGAGTTGTTAGACGGATTATCGAAAGACGGG  
ACGTCCGAGAAGCAAGTTAGTTATCAGGTCAGGACTCCCTCTGGAAAGCAGAAAGGGAGTCTGAATTTTTCGTATAAATT  
TGGGGAGAAGTTTACTGCAAAGGTGGTGGAGGAGGCGGTTACTGCTTATCCTGTT:::GCTGGTATGGCTGTTGGTTCAA  
GTTCTGGATACCAACAGCCATATCCTGCTGTGCTGGTGGGTATTACCCACCAGGTGCTGCTGGCGGATACCCACCTCAA  
CCACAGCCTGGATATGCGTAT:::CAACAACAACCAGGCTATGGTTATCCTCCCCACCACCCCAGGGTACGCTGGGTA  
CCCTCCA:::CAACCAGGATATGGGTATCCGCCAGTCCAGCAGCCACAACAGCCTCCAAAGAAGAATGGACTTGGTATGG  
GGTTGGGAGCTGGTTTGTCTAGGAGGTGCACCTGGTGGGCTGTTGATTGCGGATATCGCC [690]

998pet12

CTCGTTTACATCTCCGGCGCTGCGAACACTCAGAAGCTCAAACCCCGGTTTCACAAAGACGGCGGTTTCGGACCCCTCATG  
GAATTTTCCAATGAAGTTCACCGTTGATGAAGCCGCCGGATTACAGAACCGTCTTACTCTTGTGTGGAGATTAACACG  
ACGGGACGTTTGGCGATAAGGACGTTGGACTCGCCCATGTCCCGATCAAAGAGTTGTTAGACGGATTATCGAAAGAGGGG  
ACGTCCGAGAAGCAAGTTAGTTATCAGGTCAGGACTCCCTCCGGAAAACAGAAAGGGAGTCTGAATTTTTCGTATAAGTT  
TGGGGAGAAGTTTACTGCAAAGGTGGTGGAGGAGGCGGTTACTGCCTATCCTGTT:::TCTGGTATGGCTGTTGGTTCAA  
GTTCTGGATACCAACAGCCATATGCTGCTGCGCCTGGTGGGTATTACCCACCAGGTGCTGCTGGCGGATACCCACCTCAA  
CCACAGCCTGGATATGCGTAT:::CAACAACAACCAGGCTATGGTTATCCTCCCCACCACCCCAGGGTACGCTGGGTA  
CCCTCCACAACAACCAGGATATGGGTATCCGCCAGTCCAGCAGCCACAACAAAAGCCAAAGAAGAATGGACTGGGTATGG  
GGTTGGGAGCTGGTTTGTCTAGGAGGTGCACCTGGTGGGCTGTTGATTGCGGATATCGCC [693]

998pet12.2

CTCGTTTACATCTCCGGCGCTGCGAACACTCAGAAGCTCAAACCCCGGTTTCACAAAGACGGCGGTTTCGGACCCCTCATG  
GAATTTTCCAATGAAGTTCACCGTTGATGAAGCCGCCGGATTACAGAACCGTCTTACTCTTGTGTGGAGATTAACACG  
ACGGGACGTTTGGCGATAAGGACGTTGGACTCGCCCATGTCCCGATCAAAGAGTTGTTAGACGGATTATCGAAAGAGGGG  
ACGTCCGAGAAGCAAGTTAGTTATCAGGTCAGGACTCCCTCCGGAAAACAGAAAGGGAGTCTGAATTTTTCGTATAAGTT  
TGGGGAGAAGTTTACTGCAAAGGTGGTGGAGGAGGCGGTTACTGCTTATCCTGTT:::GCTGGTATGGCTGTTGGTTCAA  
GTTCTGGATACCAACAGCCATATGCTGCTGCGCCTGGTGGGTATTACCCACCAGGTGCTGCTGGCGGATACCCACCTCAA  
CCACAGCCTGGATATGCGTAT:::CAACAACAACCAGGCTATGGTTATCCTCCCCACCACCCCAGGGTACGCTGGGTA  
CCCTCCACAACAACCAGGATATGGGTATCCGCCAGTCCAGCAGCCACAACAGCCTCCAAAGAAGAATGGACTTGGTATGG  
GGTTGGGAGCTGGTTTGTCTAGGAGGTGCACCTGGTGGGCTGTTGATTGCGGATATCGCC [693]

;

END;
